# Supplementary material
Source: PubMed Central journal article supplement (PMC1475738)

*Supplemental information for*

**Multivalent Fertilin $\beta$  Oligopeptides:  
the Dependence of Fertilization Inhibition  
on Length and Density**

Keith A. Baessler,<sup>1</sup> Younjoo Lee,<sup>2</sup> Kenny S. Roberts,<sup>2</sup> Nicole Facompre,<sup>2</sup> Nicole S. Sampson<sup>2,\*</sup>

<sup>1</sup>Biochemistry and Structural Biology Graduate Program, Stony Brook University, Stony Brook, NY 11794-5115

<sup>2</sup>Department of Chemistry, Stony Brook University, Stony Brook, NY 11794-3400

Fmoc-C\_trt-D\_tBu-OMe

Pulse Sequence: s2pul

Solvent: CDCl3

Temp. 25.0 C / 298.1 K

File: Fmoc-C\_trt-D\_tBu-OMe-10-27

INOVA-400 "inv400"

Relax. delay 1.000 sec

Pulse 45.7 degrees

Acq. time 3.744 sec

Width 6000.6 Hz

100 repetitions

OBSERVE H1, 399.8379347 MHz

DATA PROCESSING

FT size 65536

Total time 7 min, 55 sec

# *Fmoc-Cys(trt)Asp(OtBu)-OMe*

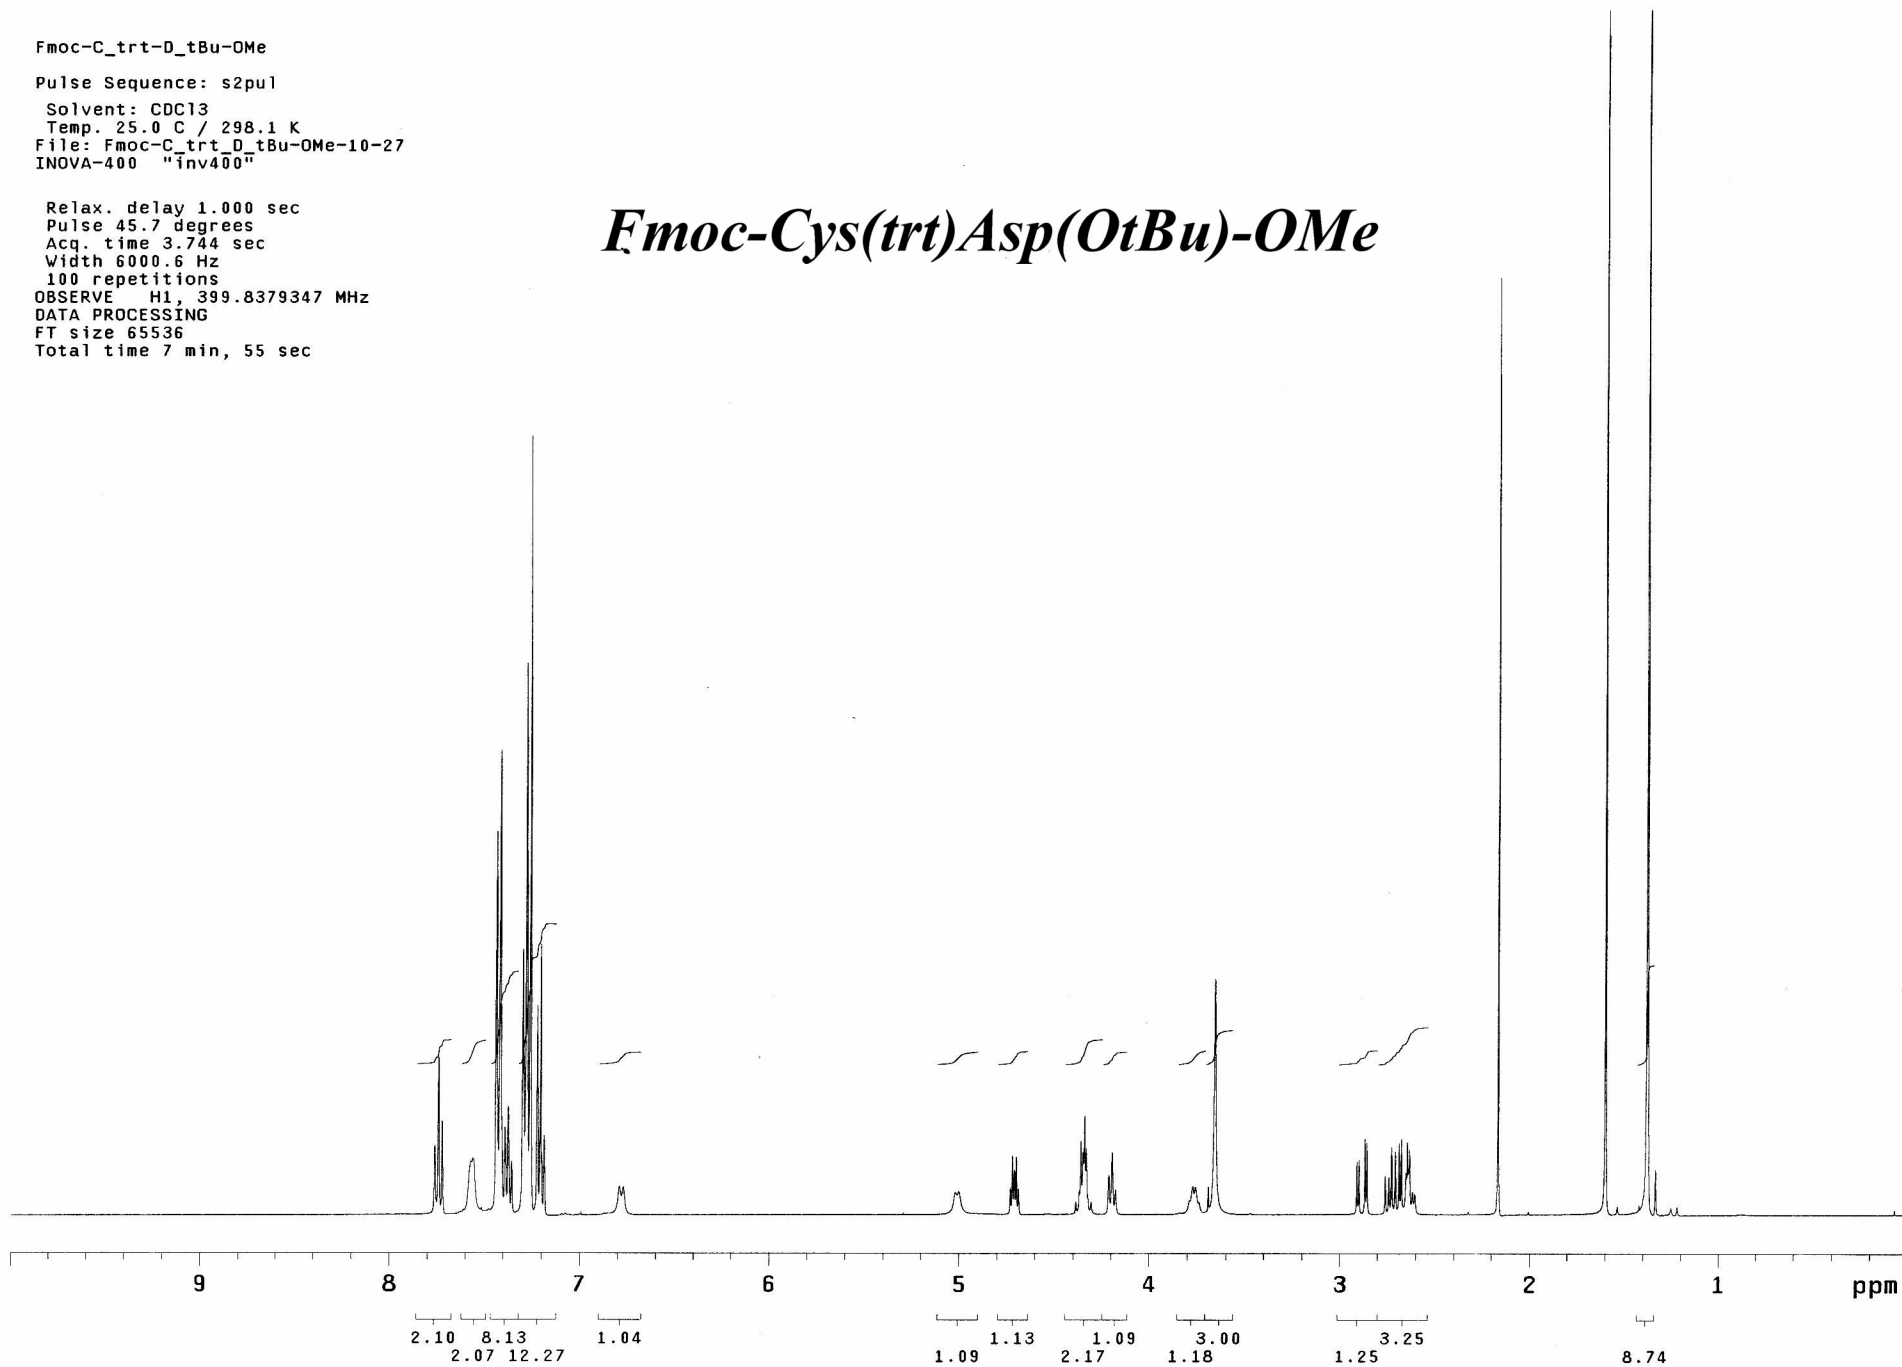

Fmoc-E(tBu)C(trt)D(tBu)-OMe

Pulse Sequence: s2pu1

Solvent: CDCl3

Temp. 25.0 C / 298.1 K

File: Fmoc-ECD-OMe-protected-10-28

INOVA-400 "inv400"

Relax. delay 1.000 sec

Pulse 45.7 degrees

Acq. time 3.744 sec

Width 6000.6 Hz

16 repetitions

OBSERVE H1, 399.8379347 MHz

DATA PROCESSING

FT size 65536

Total time 2 min, 22 sec

# *Fmoc-Glu(OtBu)Cys(trt)Asp(OtBu)-OMe*

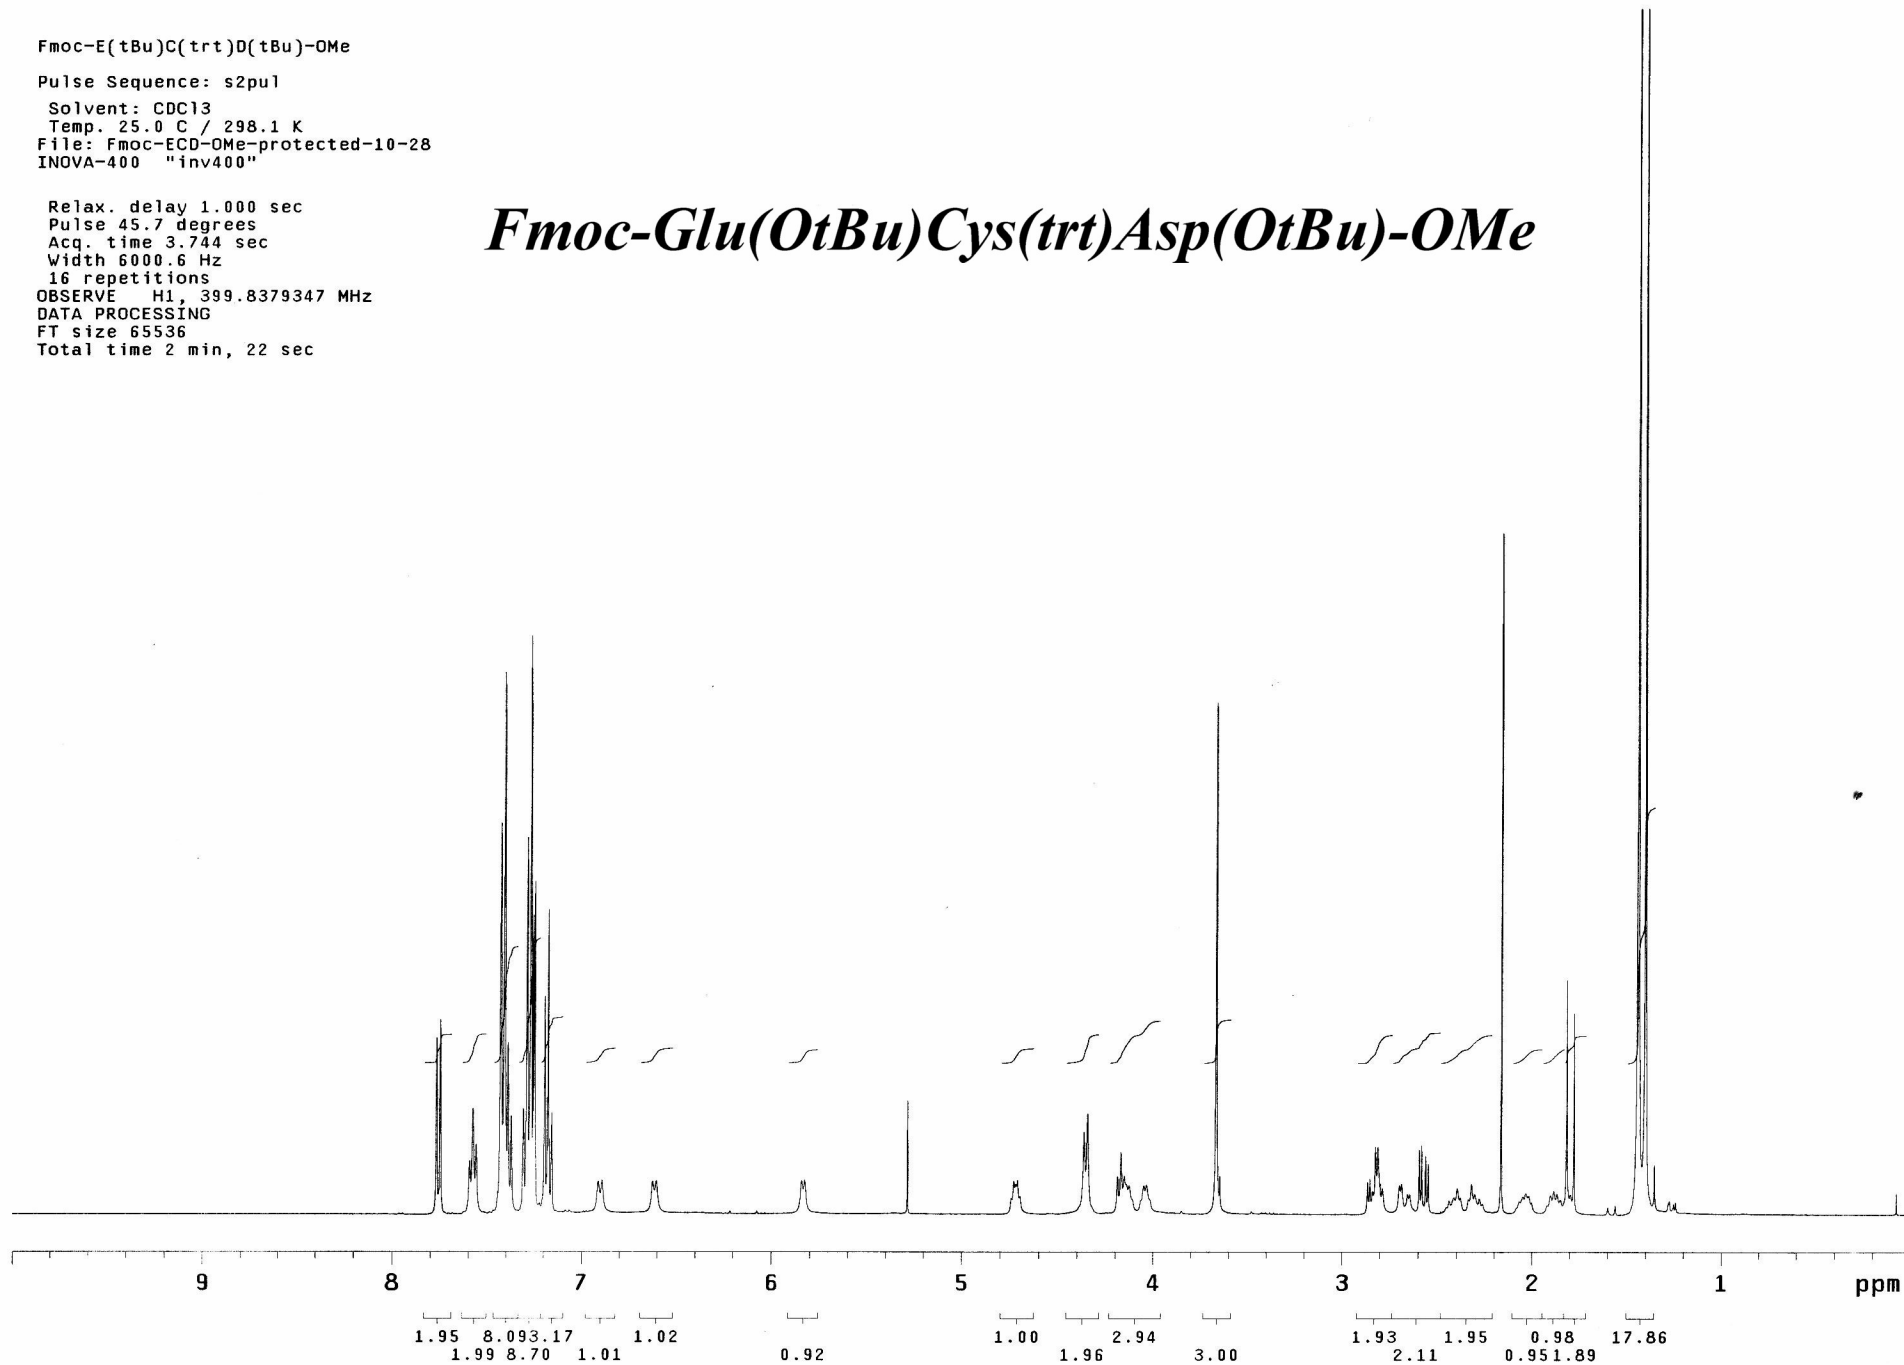

STANDARD 1H OBSERVE

Pulse Sequence: s2pu1

Solvent: CDCl3  
Temp. 25.0 C / 298.1 K  
File: Ac-ECD  
INOVA-400 "inv400"

Relax. delay 1.000 sec  
Pulse 45.7 degrees  
Acq. time 3.744 sec  
Width 6000.6 Hz  
20 repetitions  
OBSERVE H1, 399.8379347 MHz  
DATA PROCESSING  
Line broadening 0.5 Hz  
FT size 65536  
Total time 1 min, 35 sec

# *Ac-Glu(OtBu)Cys(trt)Asp(OtBu)-OMe*

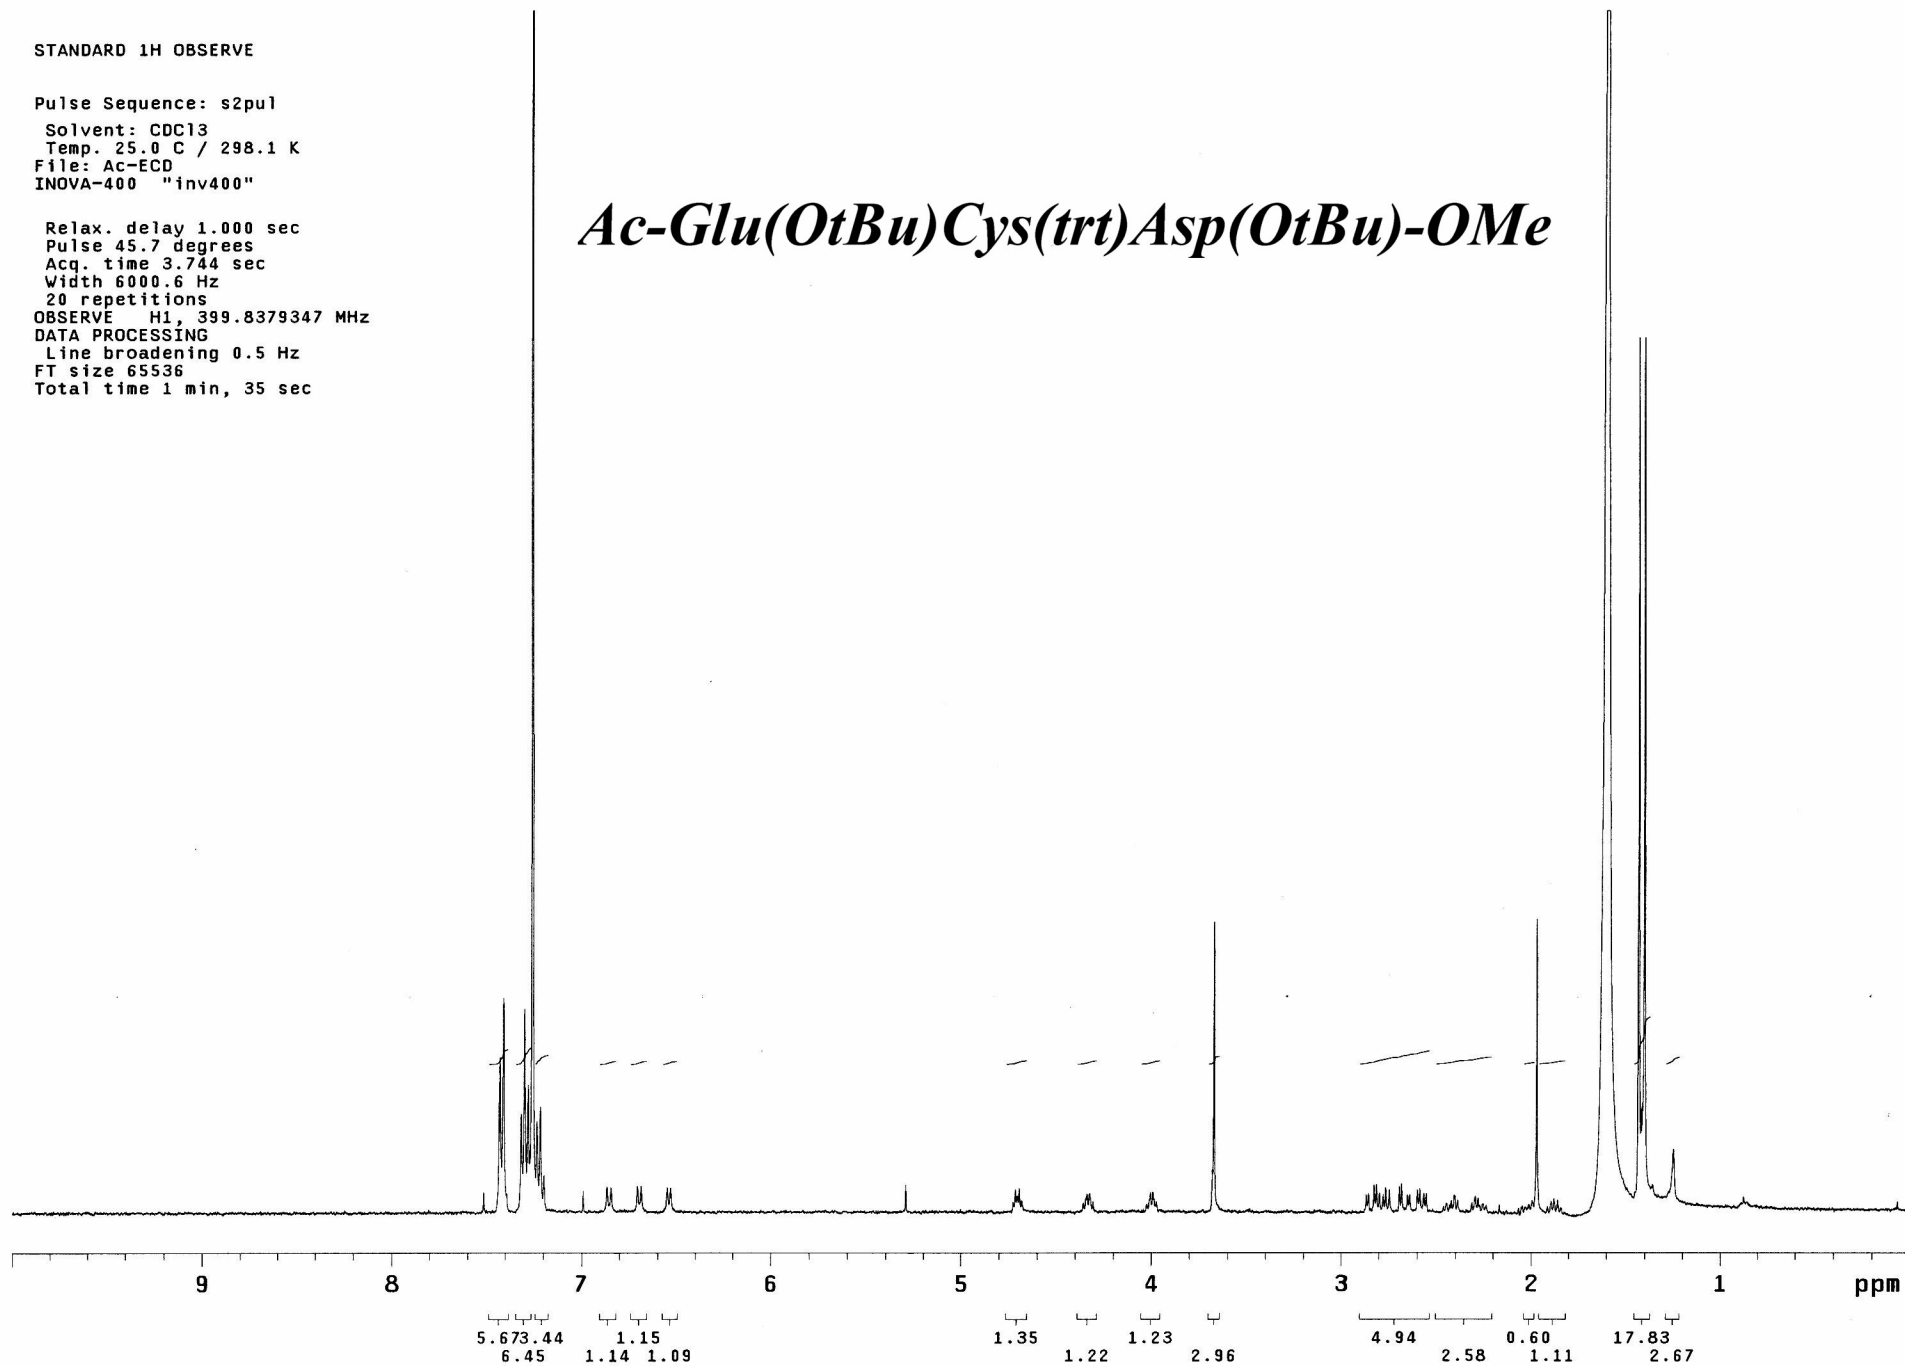

AC-ECD

AL1012-1 21 (1.810) Cm (19:35)

Platform

12-Oct-2004

1: Scan ES+  
3.24e4

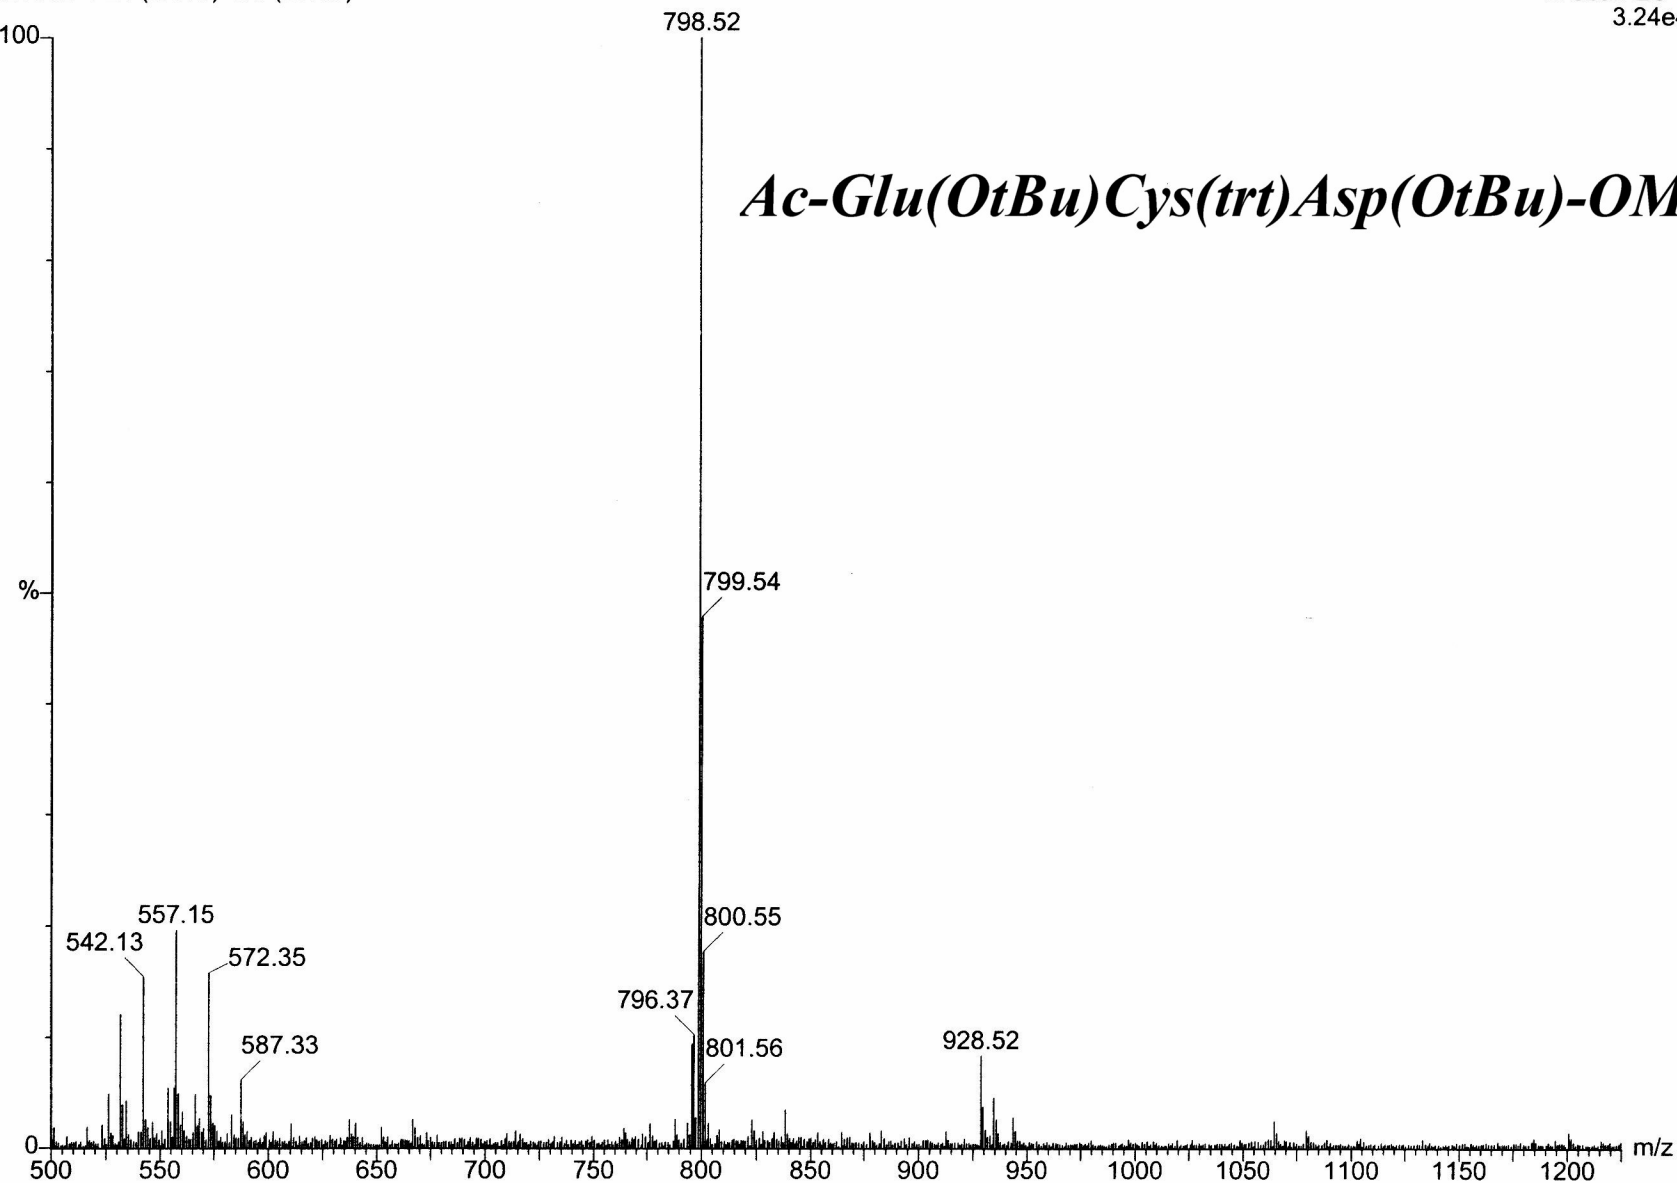

*Ac-Glu(OtBu)Cys(trt)Asp(OtBu)-OMe*

ECD-2

AL1018-6 21 (1.810) Cm (18:28)

Platform

18-Oct-2004

1: Scan ES-  
6.64e5

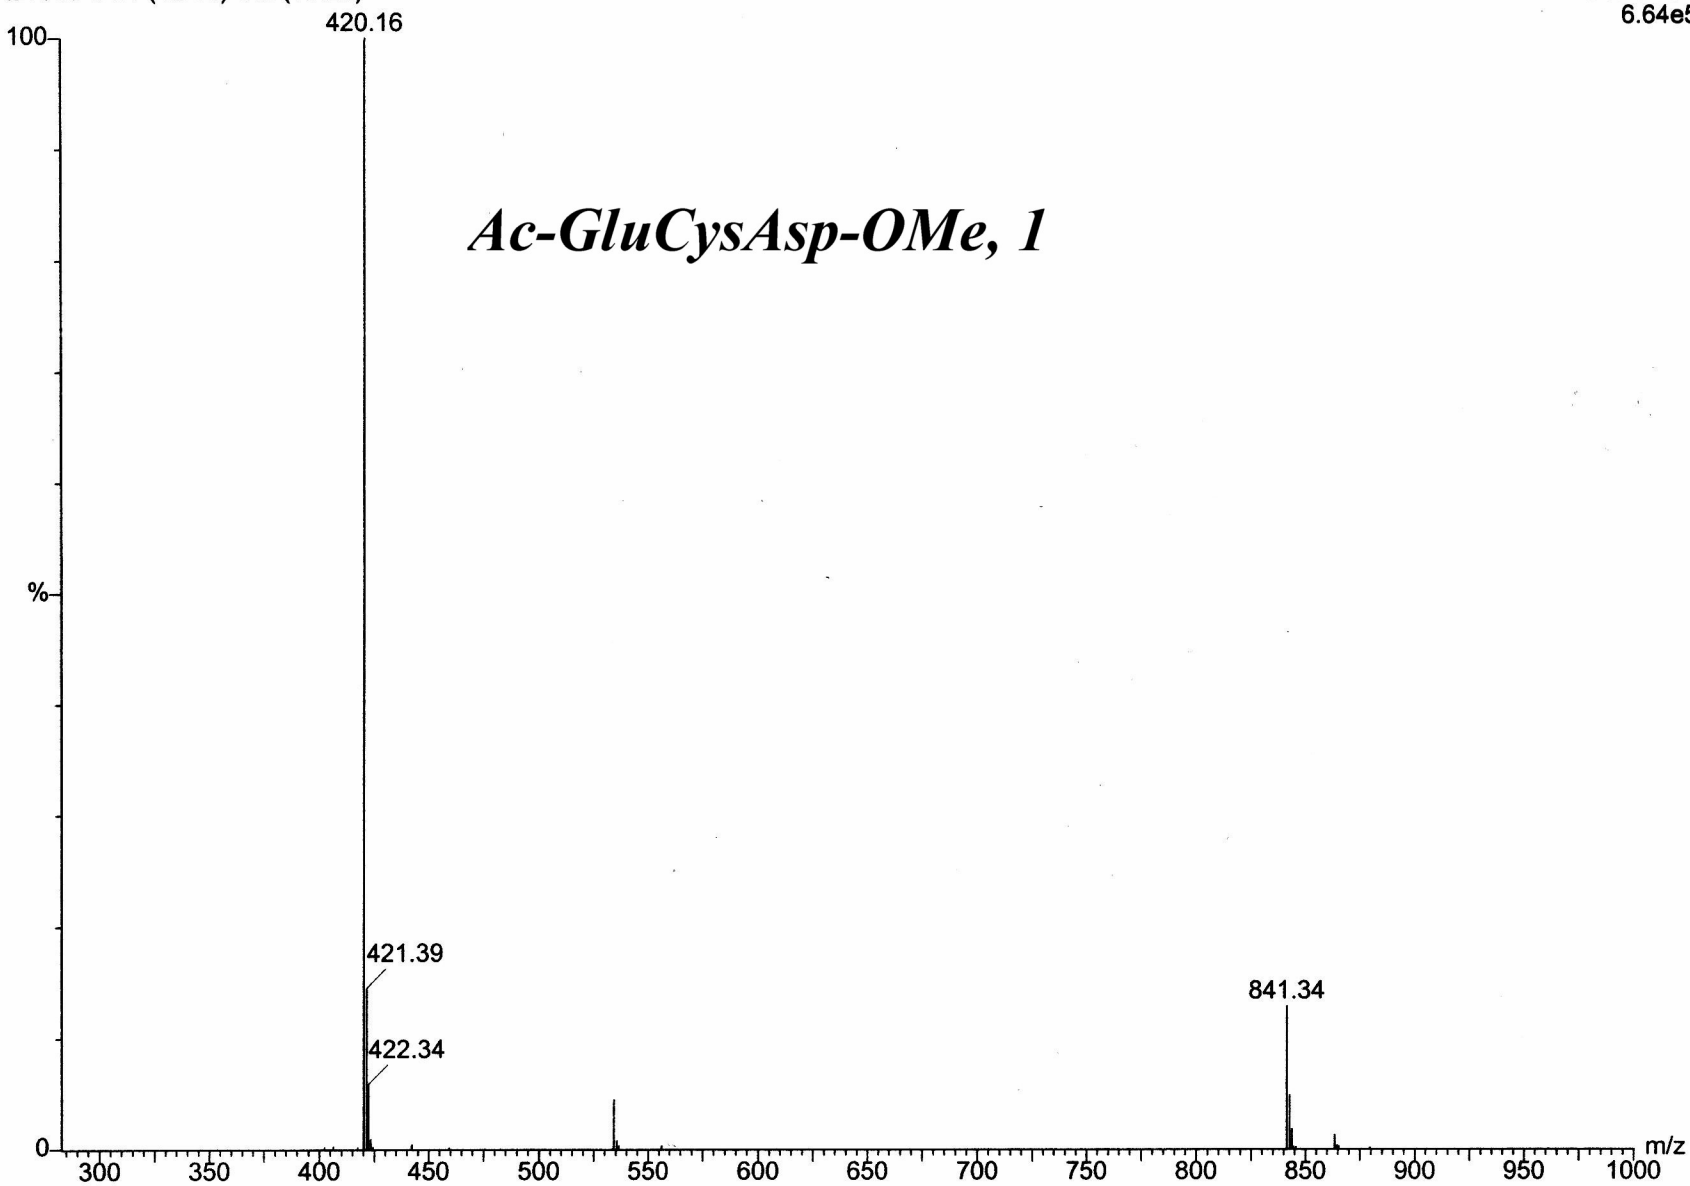



NB-E\_tBu-C\_trt-O-tBu

Pulse Sequence: s2pul

Solvent: CDCl<sub>3</sub>

Temp. 25.0 C / 298.1 K

File: NB-ECD-OMe-protected-C13

INOVA-400 "inv400"

Relax. delay 1.000 sec

Pulse 82.1 degrees

Acq. time 1.199 sec

Width 25000.0 Hz

4664 repetitions

OBSERVE C13, 100.5393046 MHz

DECOUPLE H1, 399.8399342 MHz

Power 45 dB

continuously on

WALTZ-16 modulated

DATA PROCESSING

FT size 65536

Total time 3 hr, 4 min, 1 sec

# *NB-Glu(OtBu)Cys(trt)Asp(OtBu)-OMe, 3*

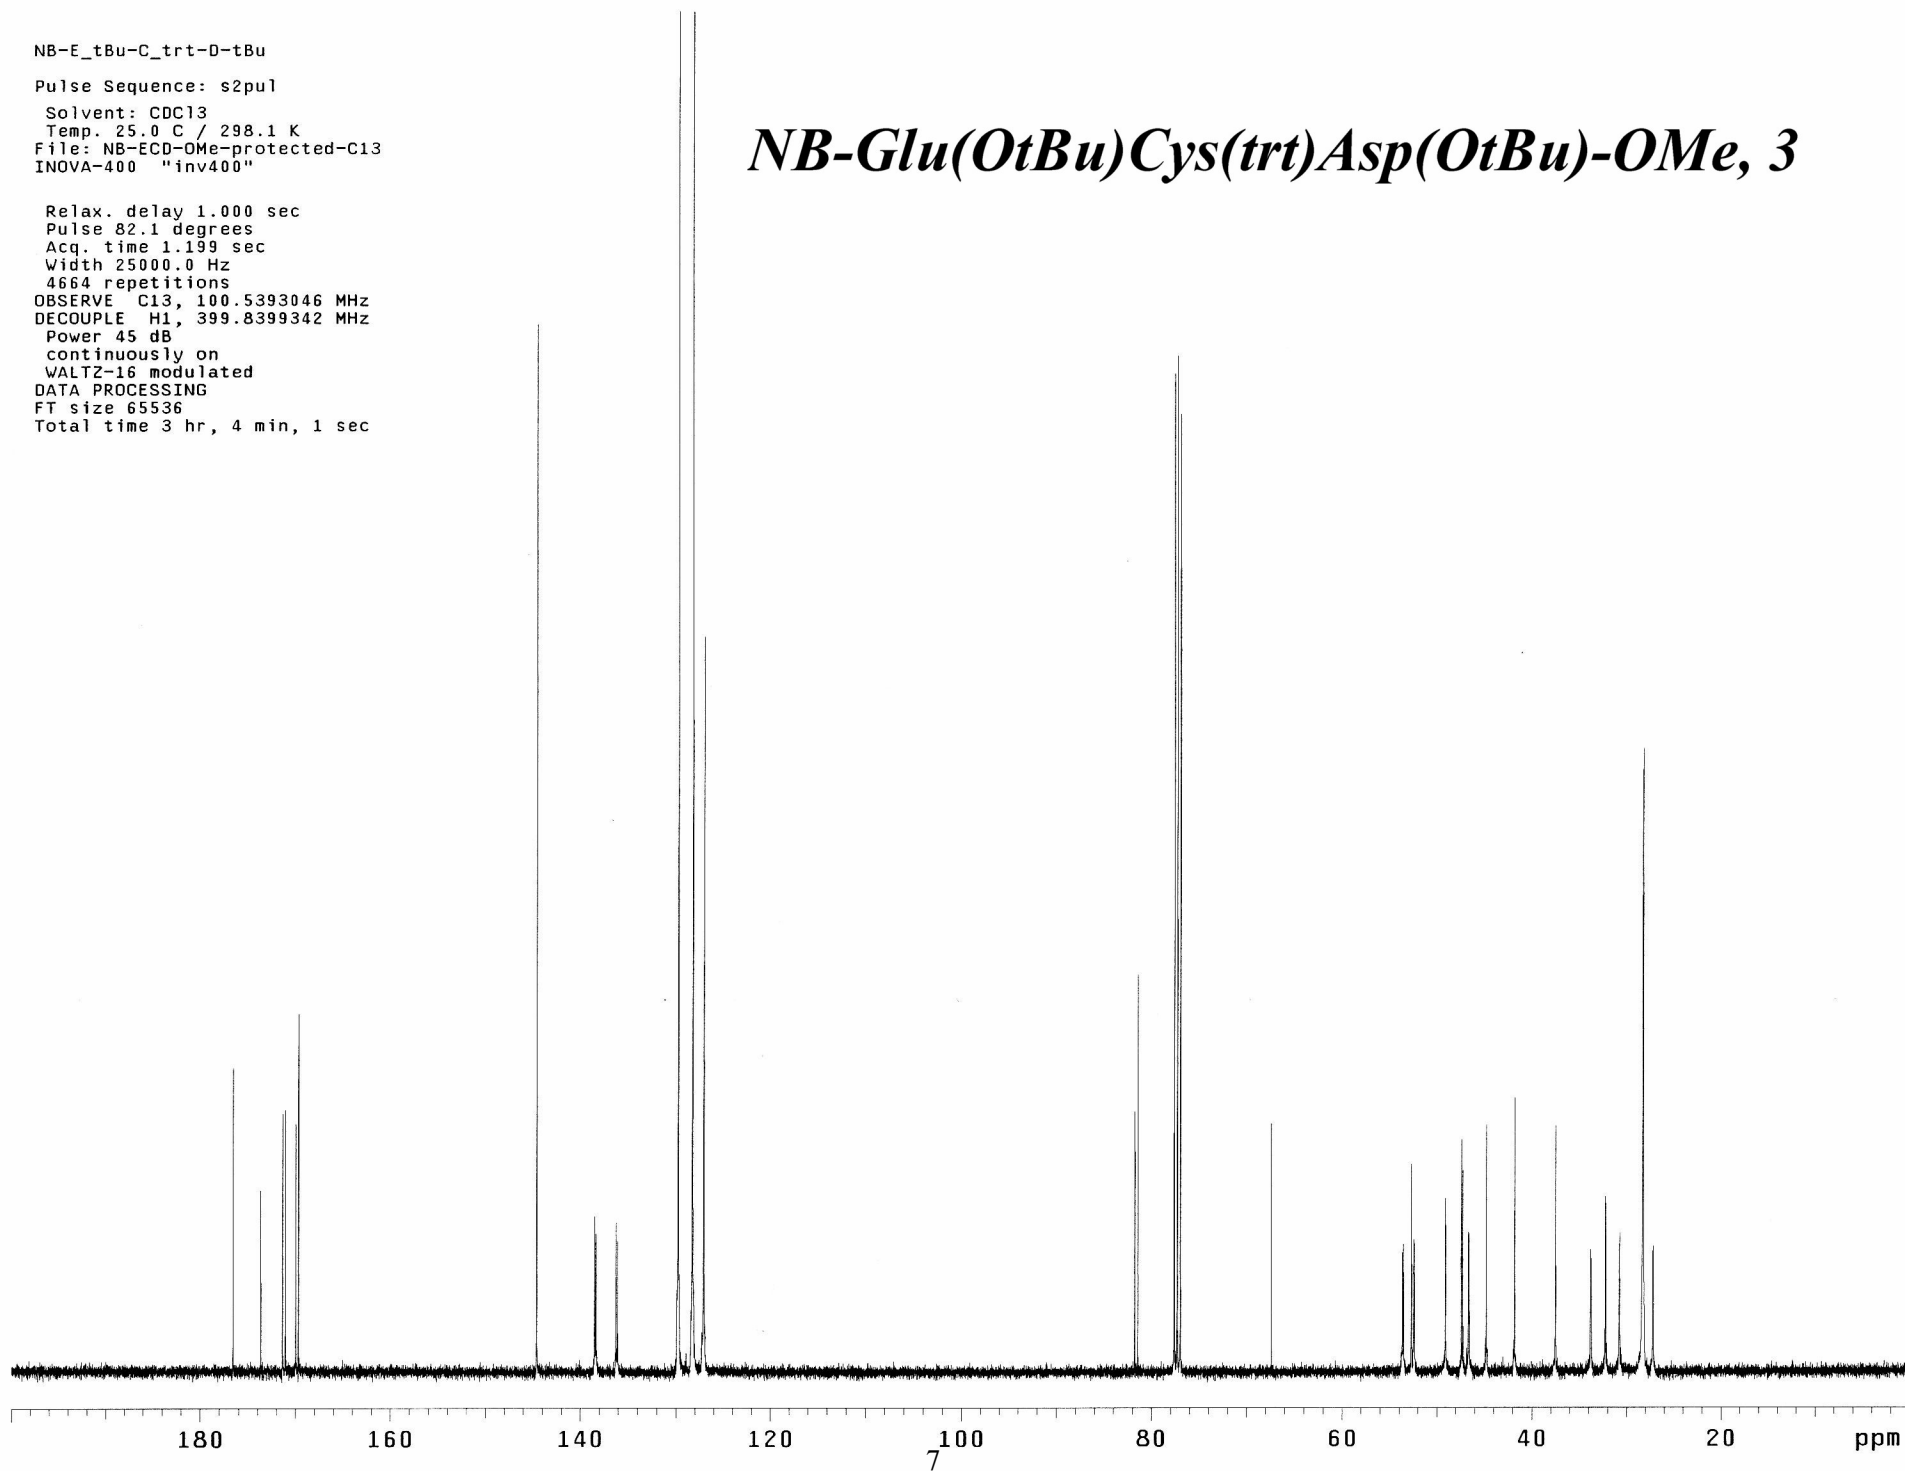



Cbz-S(tBu)A-OMe

Pulse Sequence: s2pu1

Solvent: CDCl3  
Temp. 25.0 C / 298.1 K  
File: Cbz-SA-OMe-protected-10-27  
INOVA-400 "inv400"

Relax. delay 1.000 sec  
Pulse 45.7 degrees  
Acq. time 3.744 sec  
Width 6000.6 Hz  
30 repetitions  
OBSERVE H1, 399.8379347 MHz  
DATA PROCESSING  
FT size 65536  
Total time 2 min, 22 sec

# *Cbz-Ser(tBu)Ala-OMe*

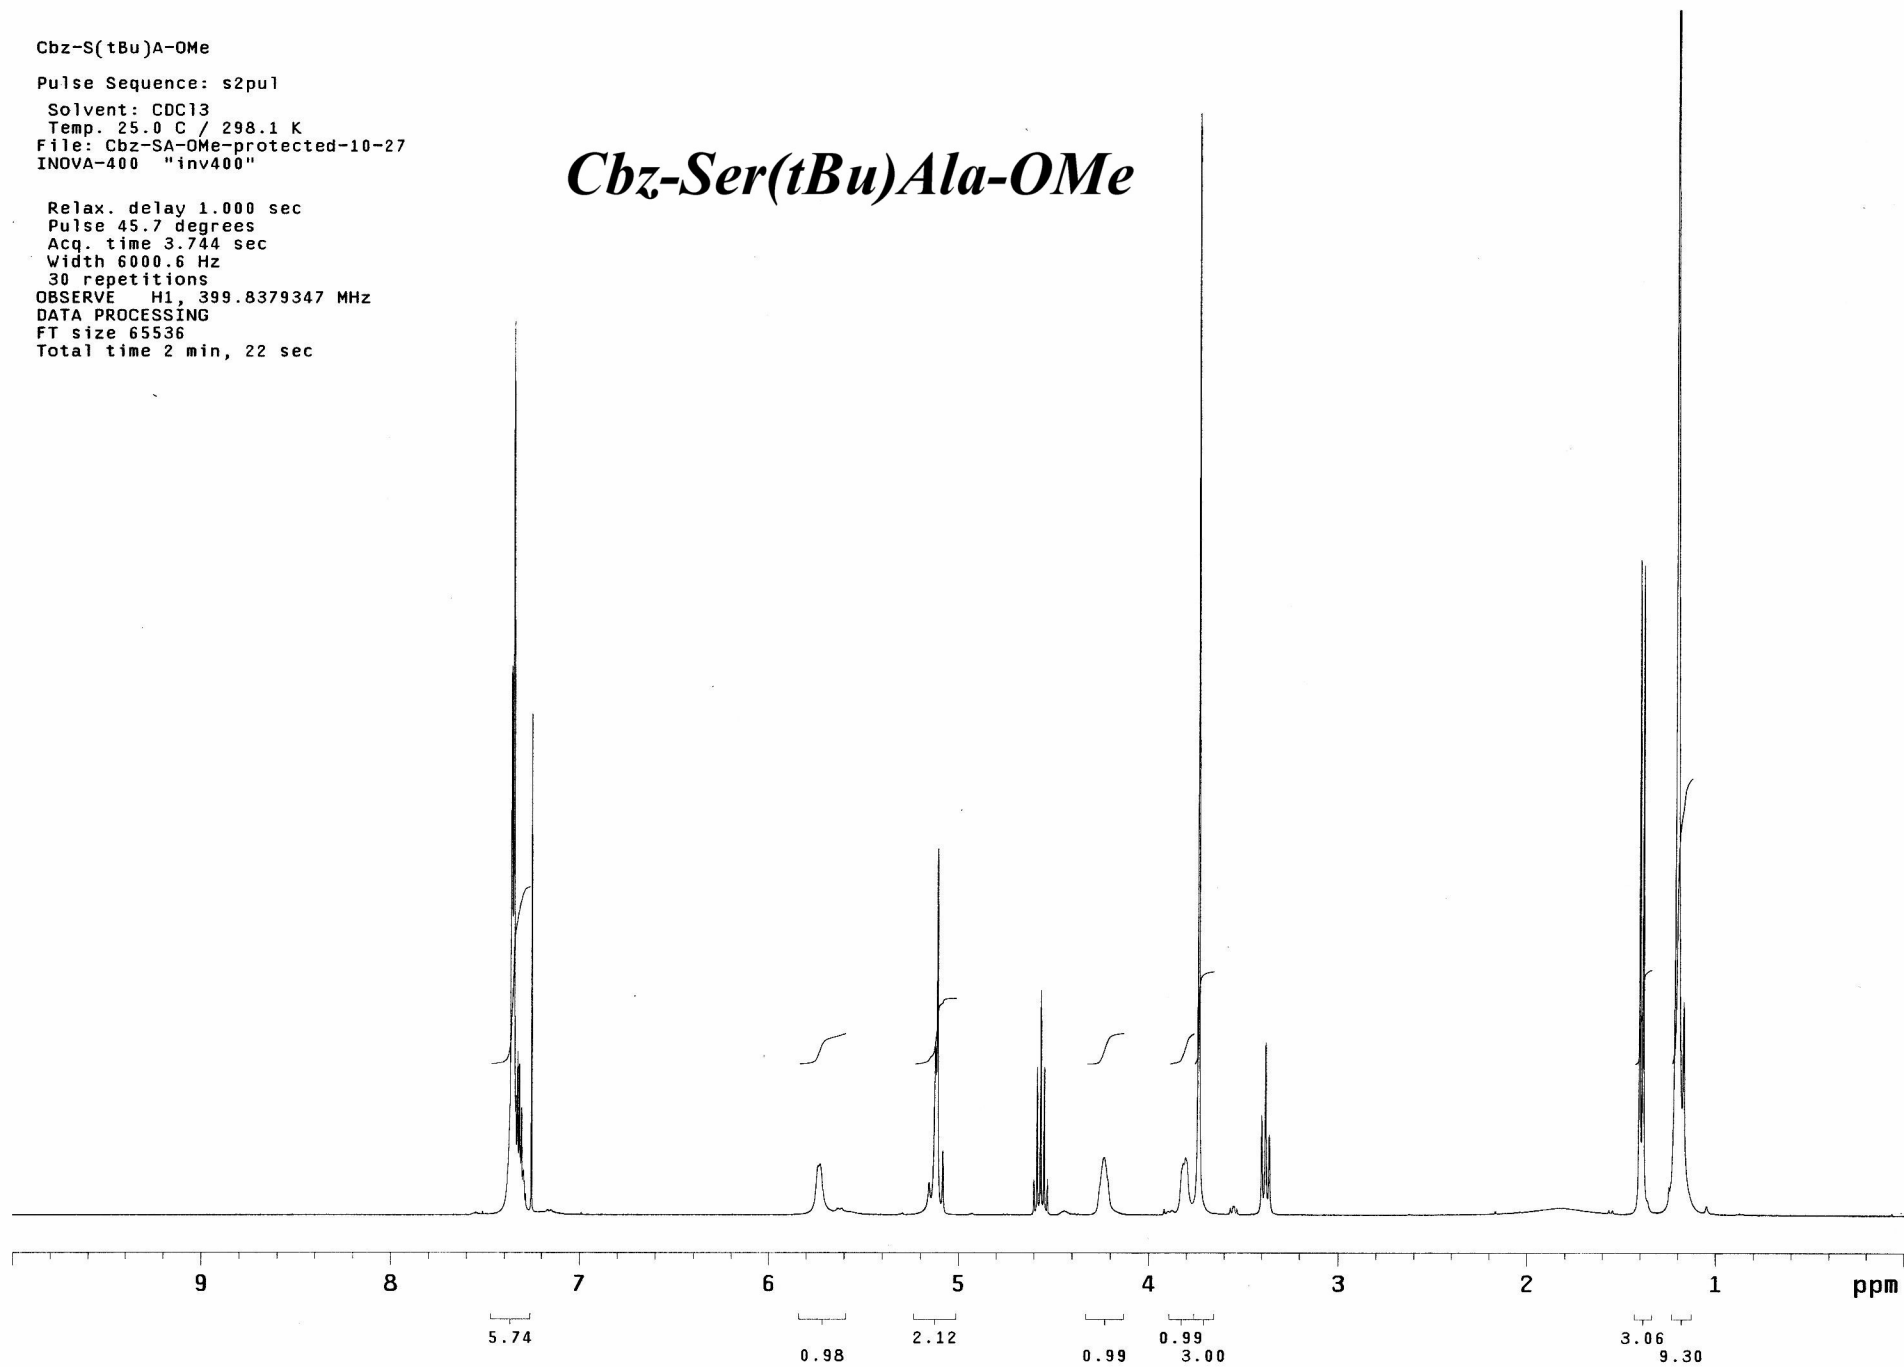

STANDARD 1H OBSERVE

Pulse Sequence: s2pu1

Solvent: CDC13  
Temp. 25.0 C / 298.1 K  
File: ZESA-10-17  
INOVA-400 "inv400"

Relax. delay 1.000 sec  
Pulse 45.7 degrees  
Acq. time 3.744 sec  
Width 6000.6 Hz  
40 repetitions  
OBSERVE H1, 399.8379347 MHz  
DATA PROCESSING  
FT size 65536  
Total time 3 min, 10 sec

# *Cbz-Glu(OtBu)Ser(tBu)Ala-OMe*

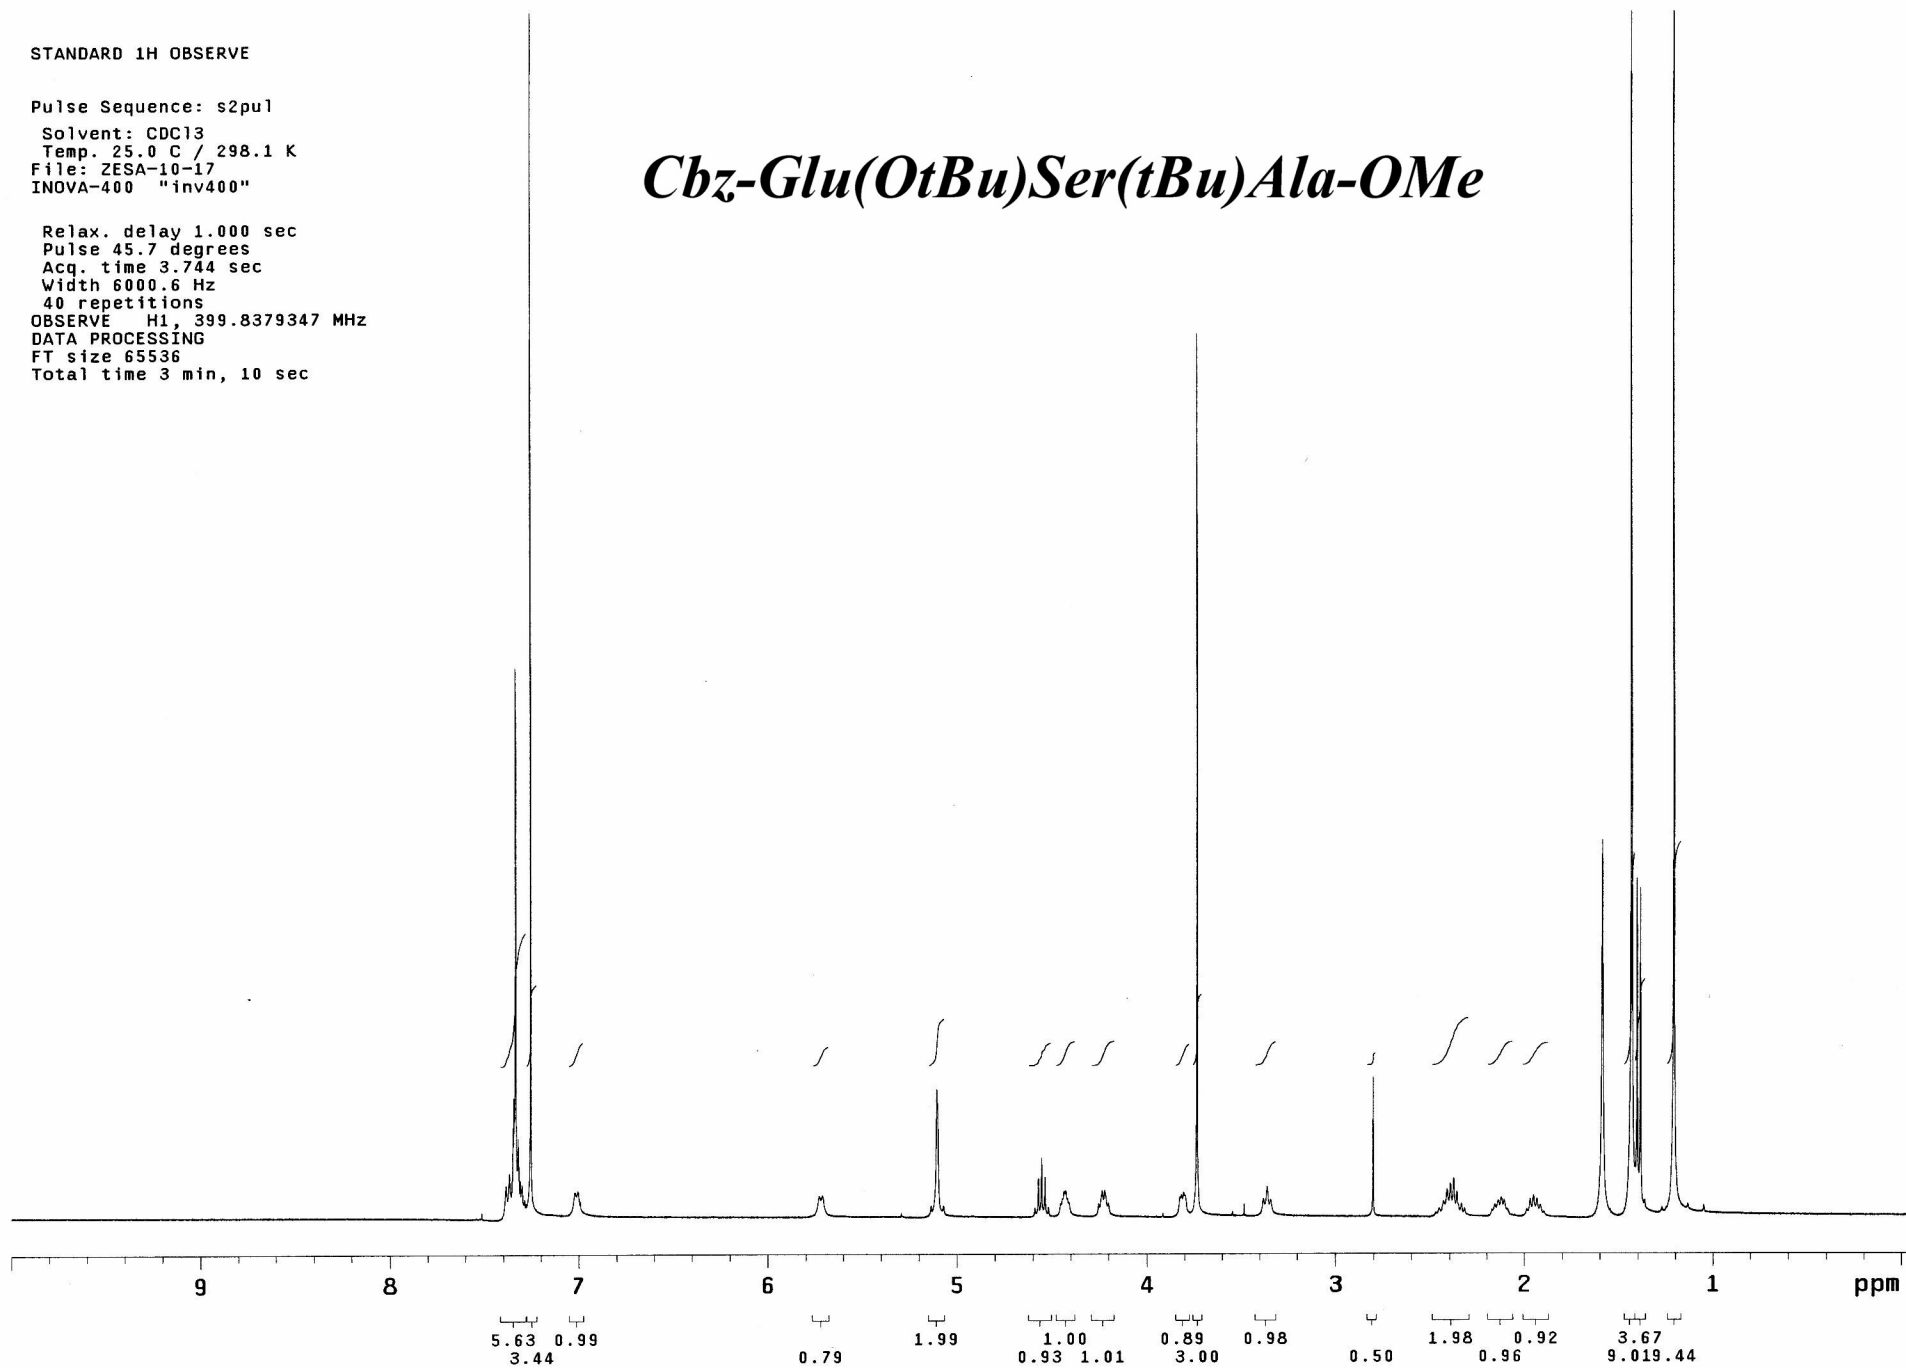

STANDARD 1H OBSERVE

Pulse Sequence: s2pu1

Solvent: CDCl3

Temp. 25.0 C / 298.1 K

File: NB-ESA-10-20

INOVA-400 "inv400"

Relax. delay 1.000 sec

Pulse 45.7 degrees

Acq. time 3.744 sec

Width 6000.6 Hz

50 repetitions

OBSERVE H1, 399.8379347 MHz

DATA PROCESSING

FT size 65536

Total time 3 min, 57 sec

# *NB-Glu(OtBu)Ser(tBu)Ala-OMe, 4*

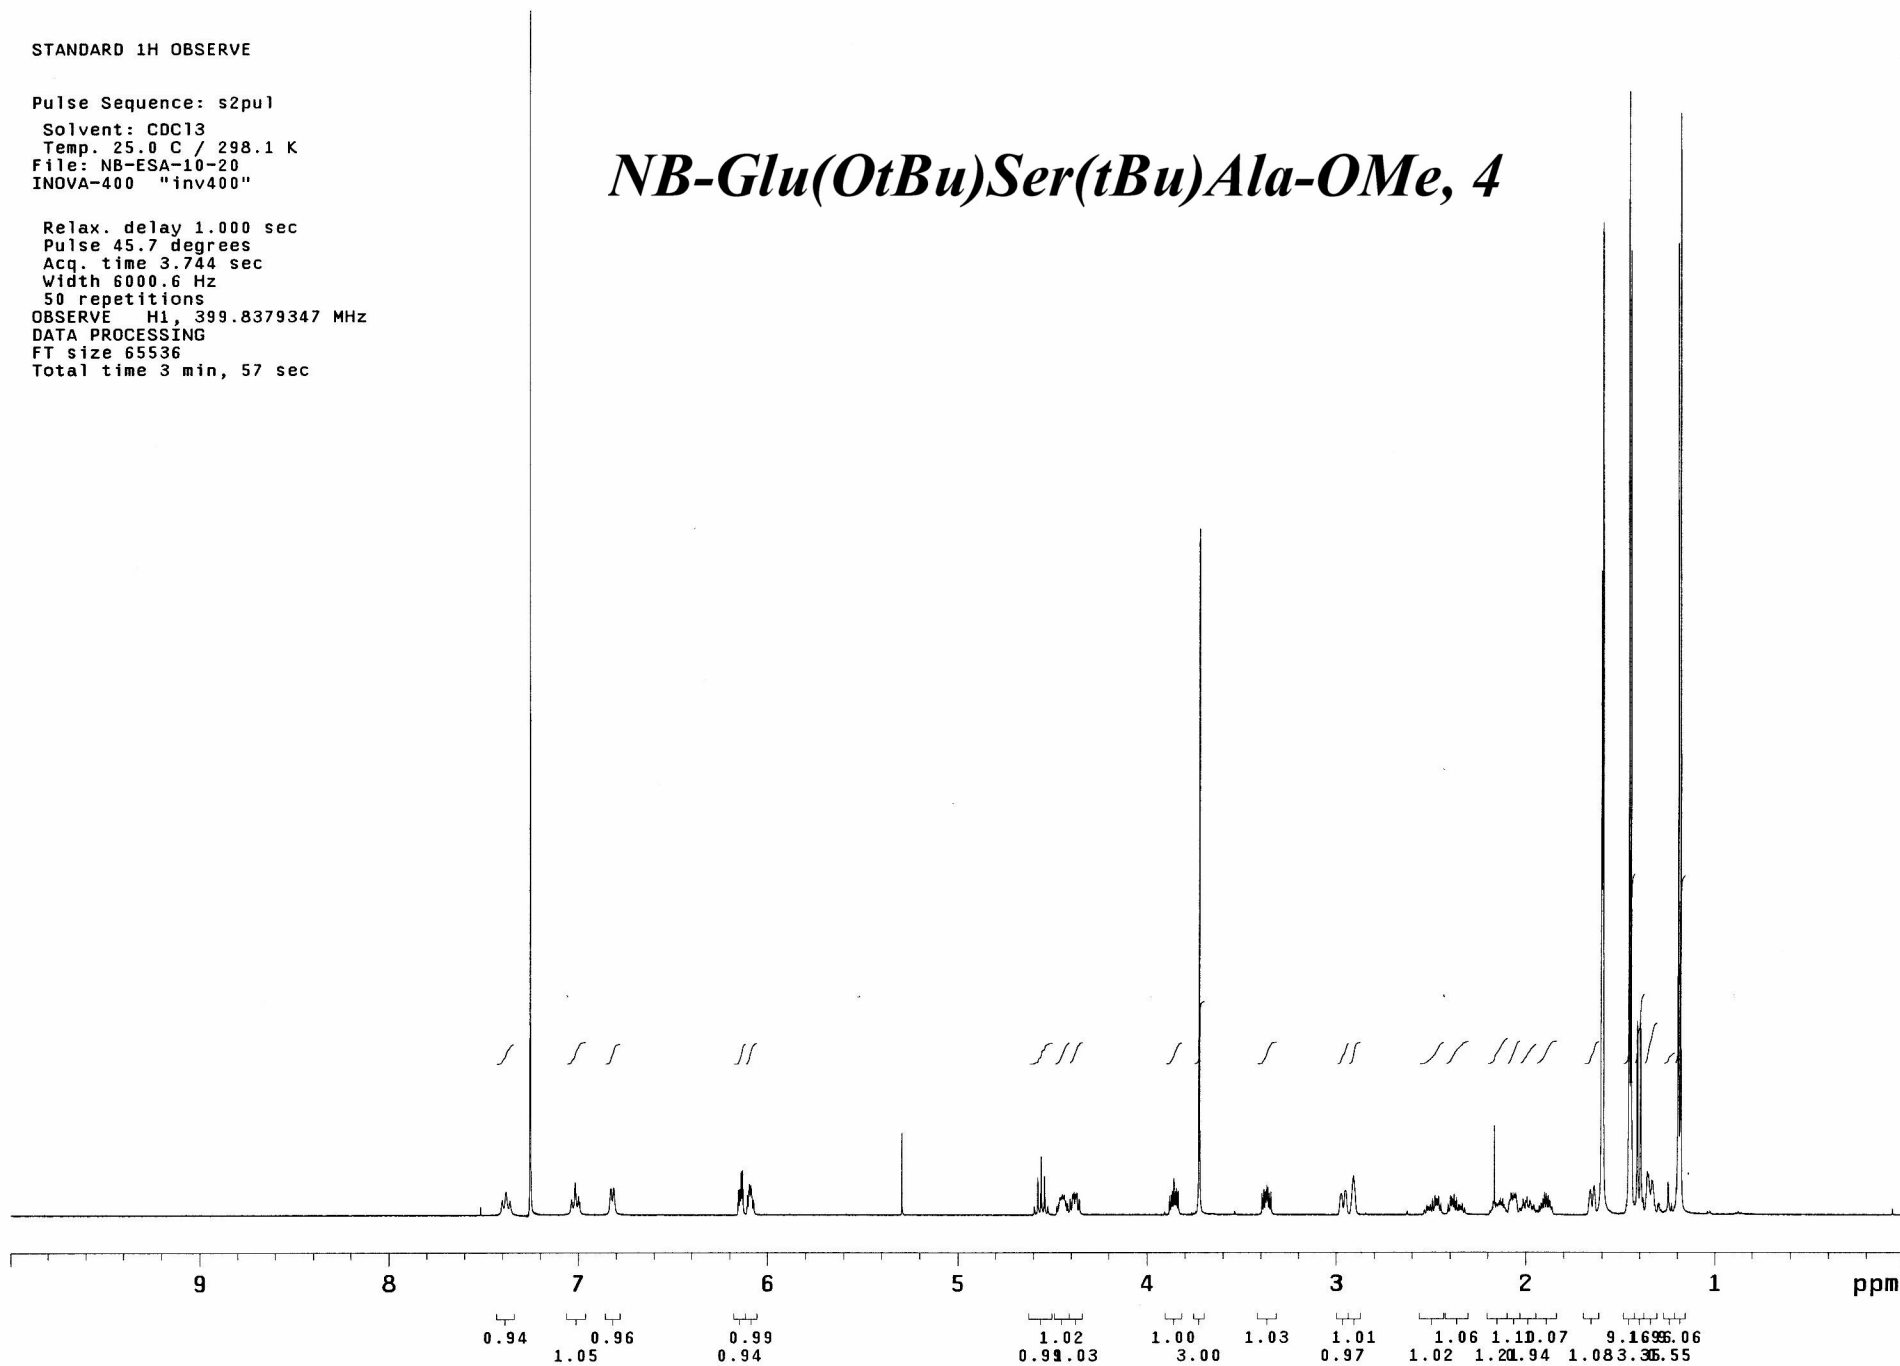

NB-E\_tBu-S\_tBu\_A-OMe

Pulse Sequence: s2pu1

Solvent: CDCl3  
Temp. 25.0 C / 298.1 K  
File: NB-ESA-OMe-protected-C13  
INOVA-400 "inv400"

# *NB-Glu(OtBu)Ser(tBu)Ala-OMe, 4*

Relax. delay 1.000 sec  
Pulse 82.1 degrees  
Acq. time 1.199 sec  
Width 25000.0 Hz  
4160 repetitions  
OBSERVE C13, 100.5393046 MHz  
DECOUPLE H1, 399.8399342 MHz  
Power 45 dB  
continuously on  
WALTZ-16 modulated  
DATA PROCESSING  
Line broadening 2.0 Hz  
FT size 65536  
Total time 3 hr, 4 min, 1 sec

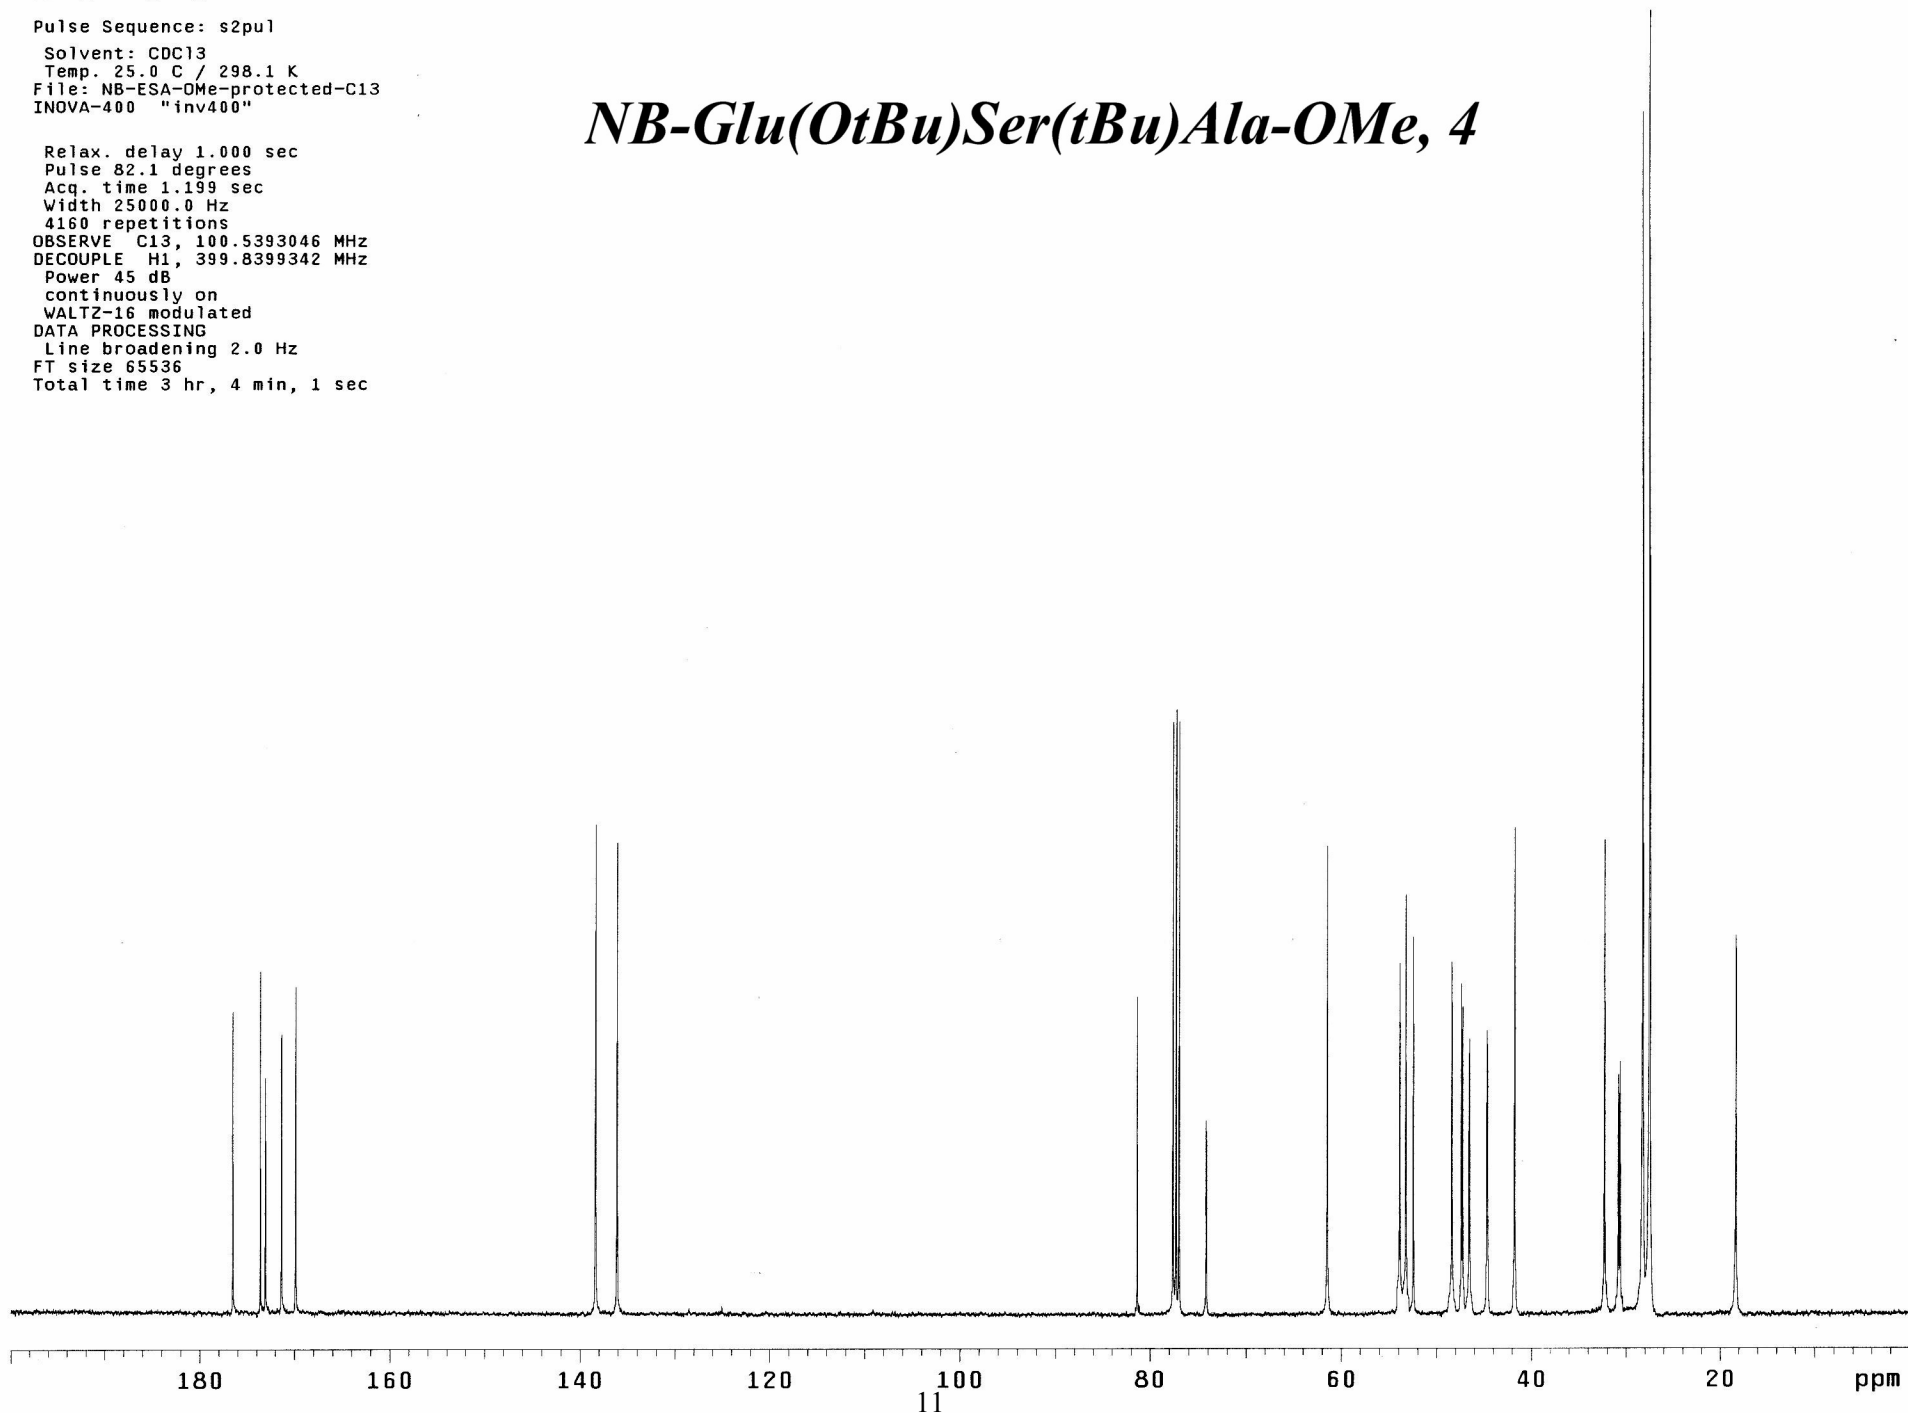

ECD-10mer-2nd Cat

Pulse Sequence: presat

Solvent: D2O  
Temp. 25.0 C / 298.1 K  
File: ECD-10mer-Fin  
INOVA-400 "inv400"

Pulse 45.7 degrees  
Acq. time 3.744 sec  
Width 6000.6 Hz  
8016 repetitions  
OBSERVE H1, 399.8389622 MHz  
DATA PROCESSING  
FT size 65536  
Total time 14 hr, 35 min, 38 sec

# Polymer 3<sub>10</sub>

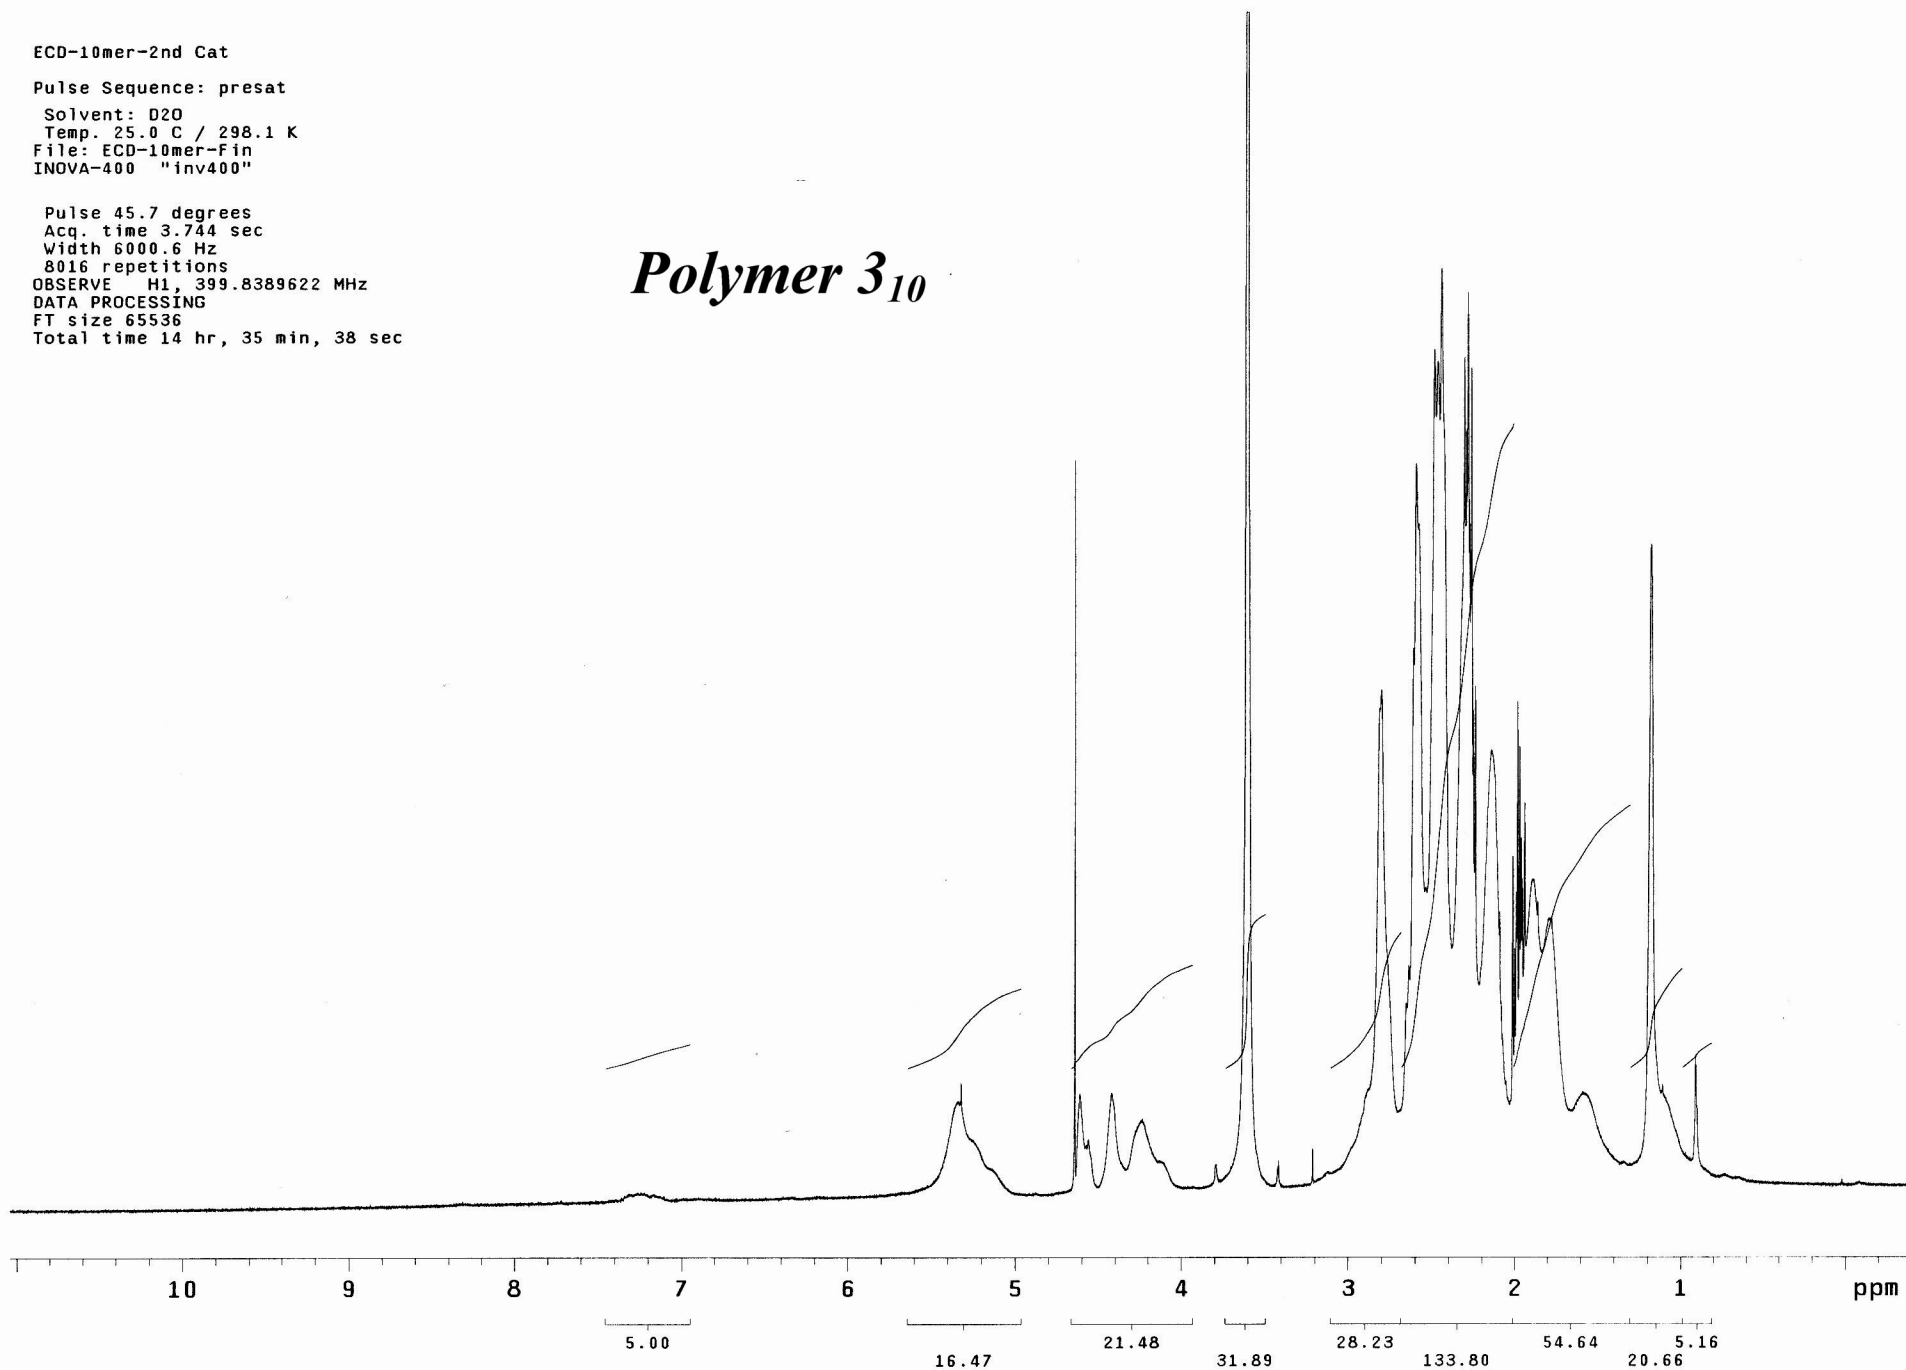

ECD-3mer

Pulse Sequence: presat

Solvent: D2O  
Temp. 25.0 C / 298.1 K  
File: ECD-3mer-Dec\_09\_04  
INNOVA-500 "inv500"

Pulse 52.2 degrees  
Acq. time 1.892 sec  
Width 8000.0 Hz  
1208 repetitions  
OBSERVE H1, 499.8957669 MHz  
DATA PROCESSING  
FT size 32768  
Total time 1 hr, 53 min, 23 sec

# *Polymer 3<sub>3</sub>*

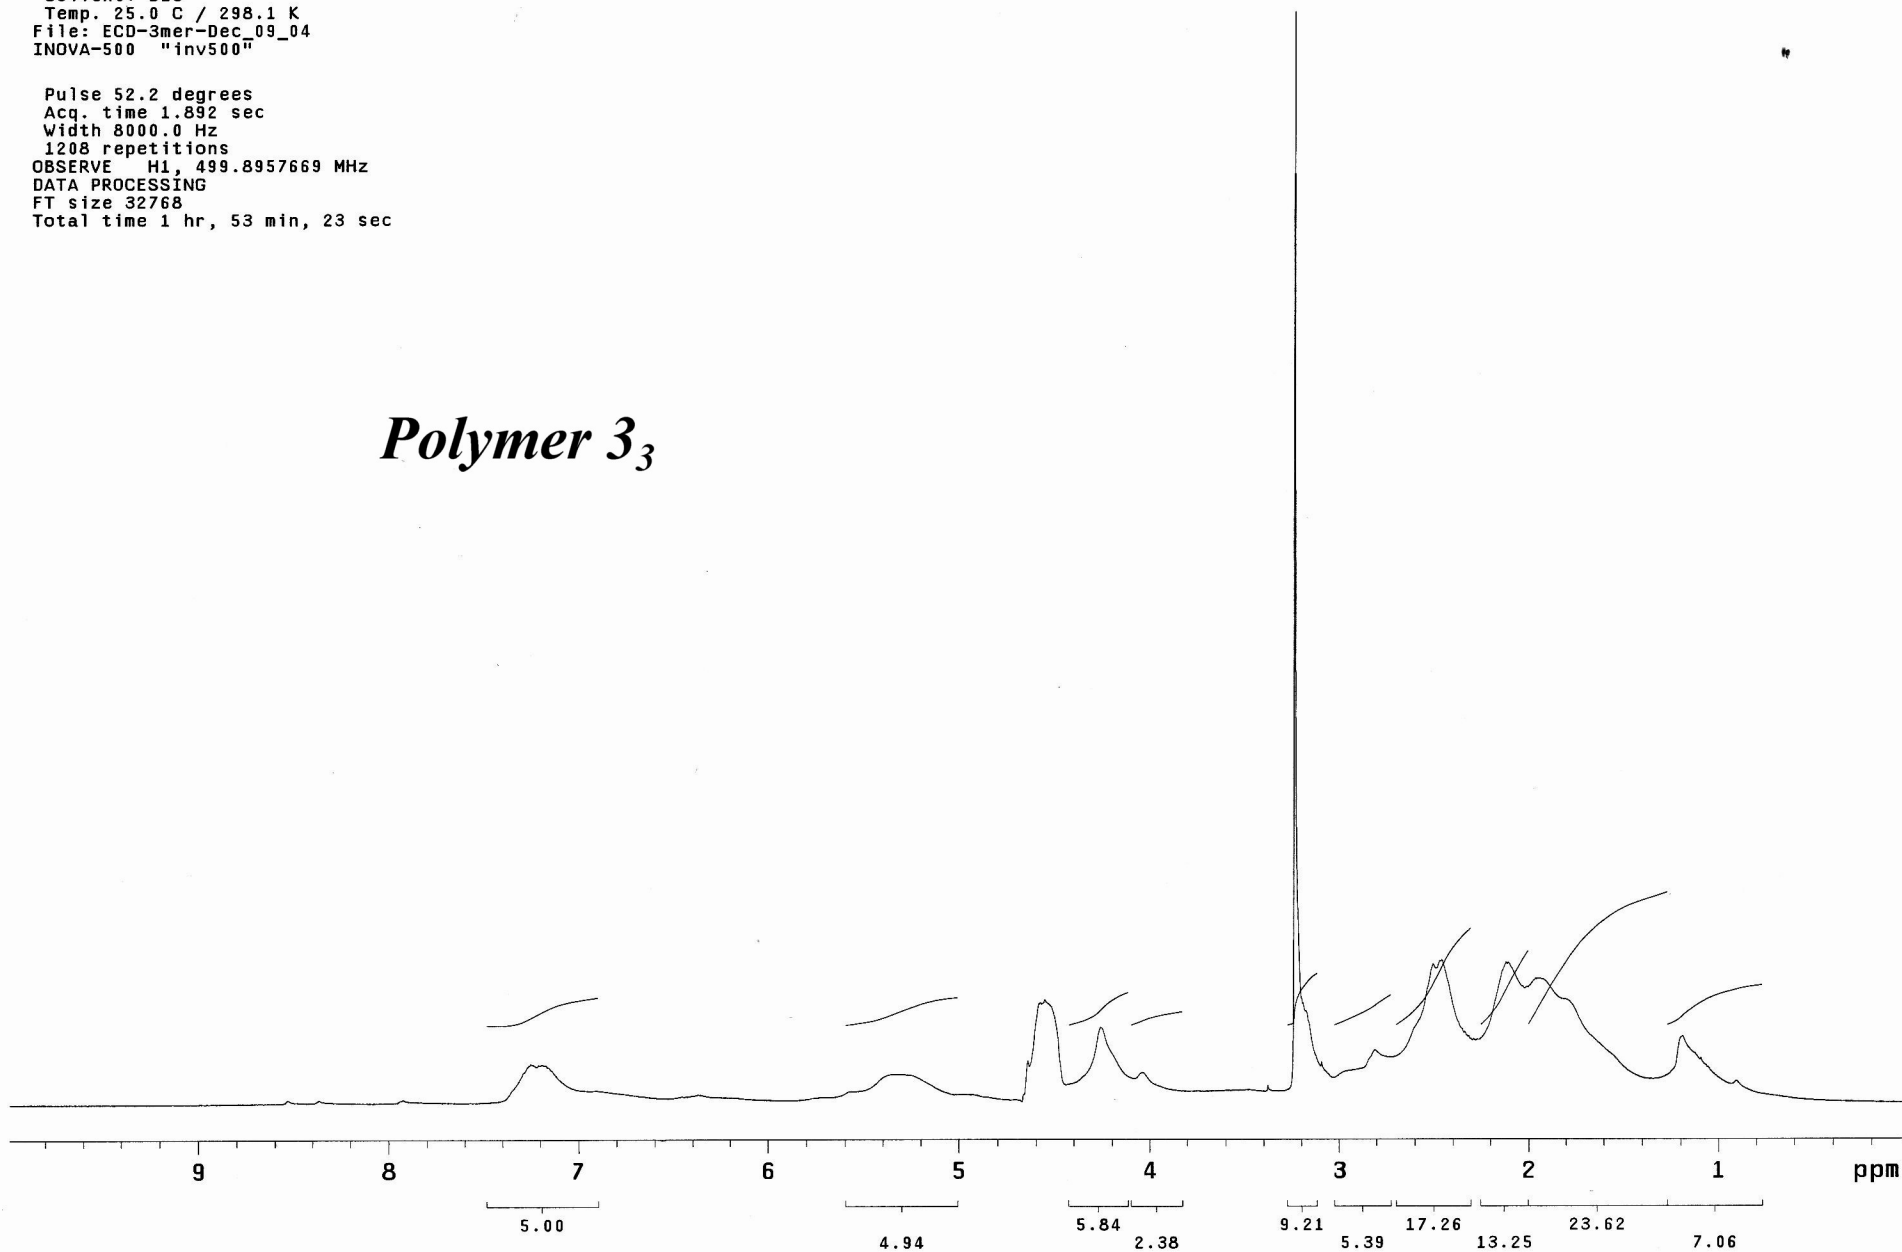

ECD-6mer

Pulse Sequence: presat

Solvent: D2O

Temp. 25.0 C / 298.1 K

File: ECD-6mer-Dec\_09\_04-A

INOVA-500 "inv500"

Pulse 52.2 degrees

Acq. time 1.892 sec

Width 8000.0 Hz

1576 repetitions

OBSERVE H1, 499.8957669 MHz

DATA PROCESSING

FT size 32768

Total time 1 hr, 53 min, 23 sec

## *Polymer 3<sub>6</sub>*

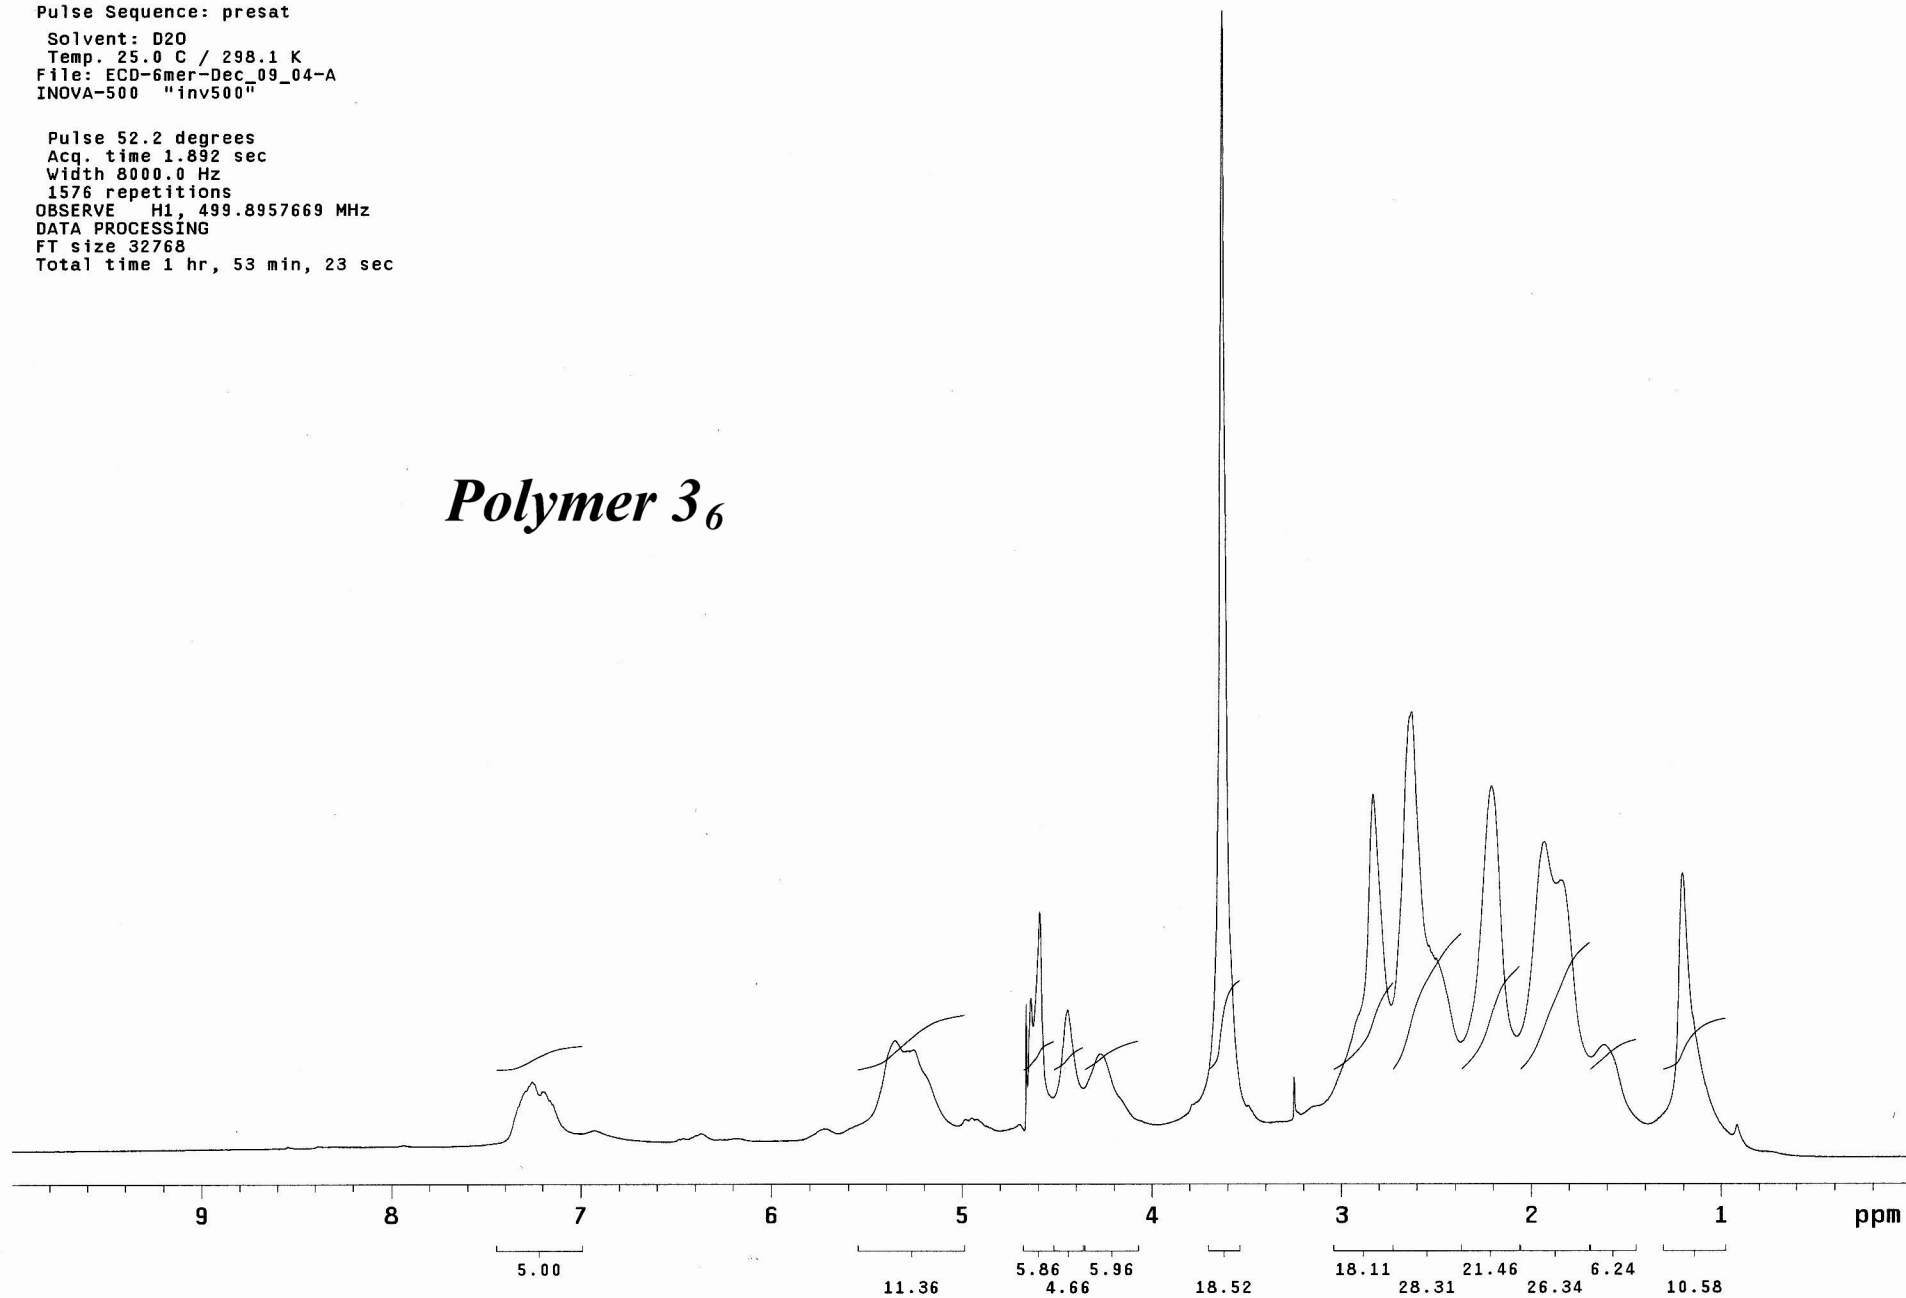

*Polymer 370*

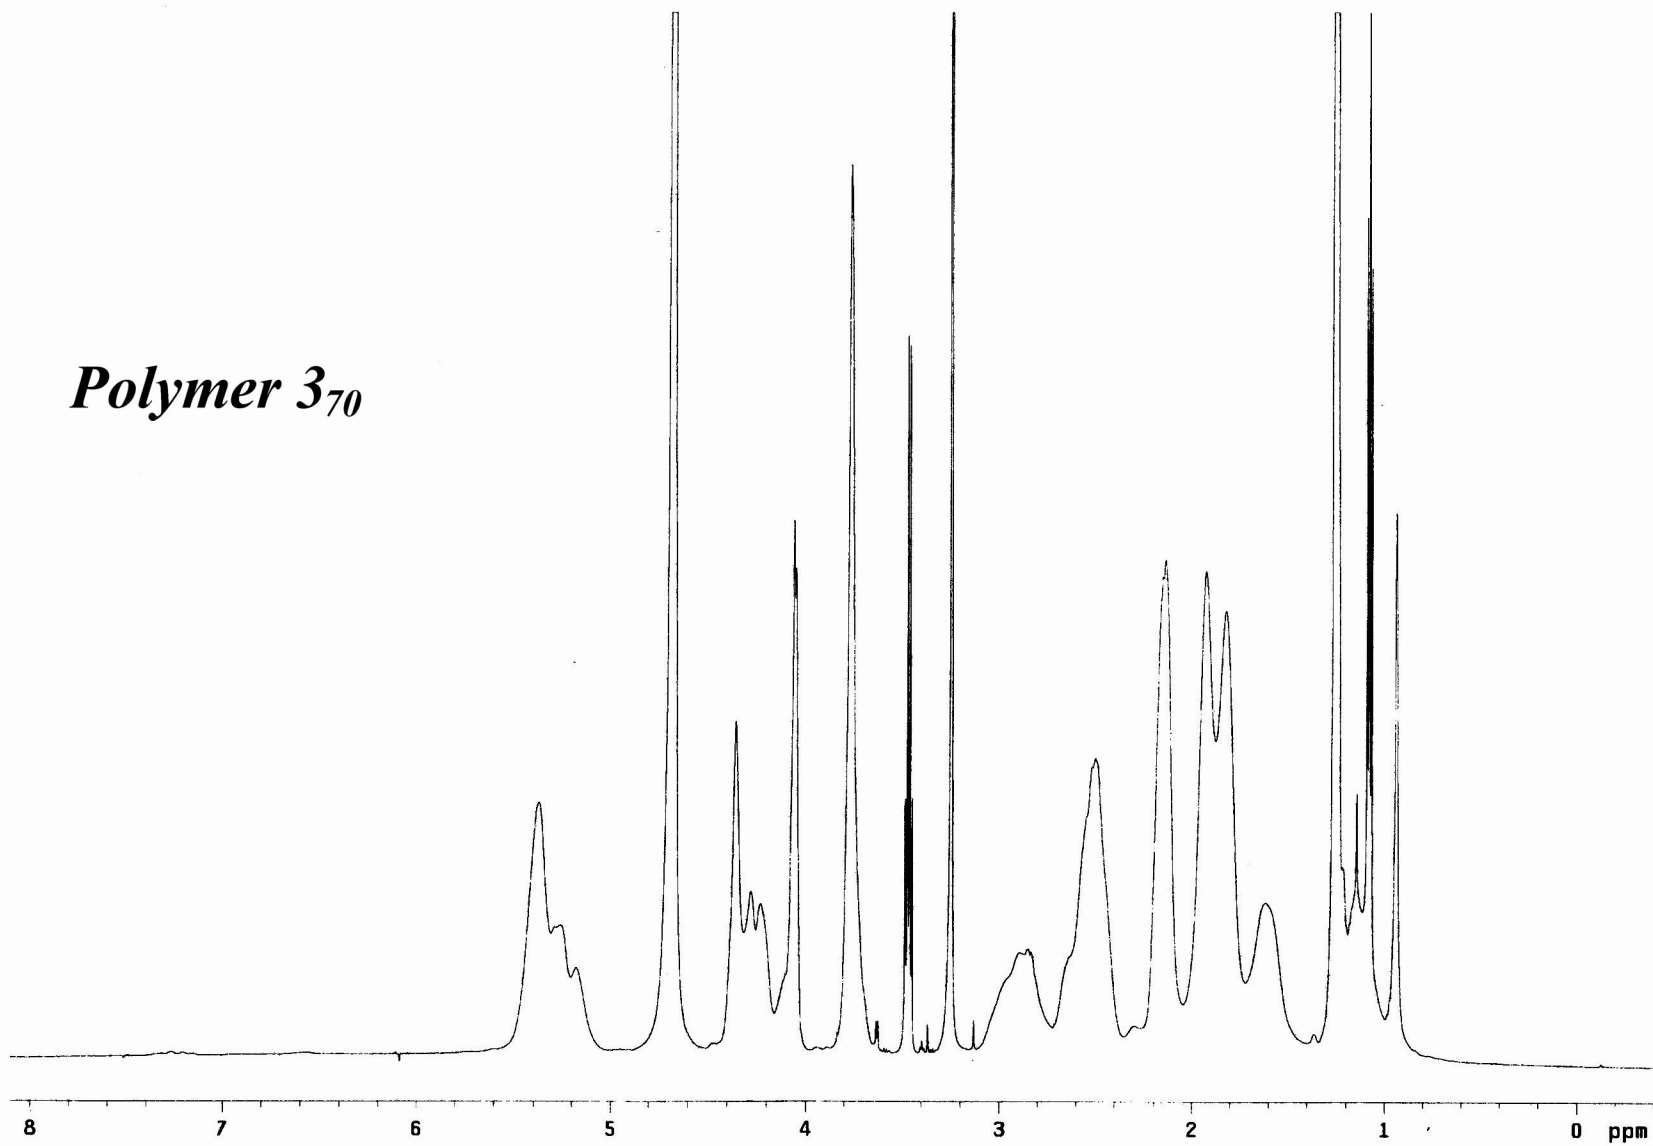



*Polymer 4<sub>10</sub>*

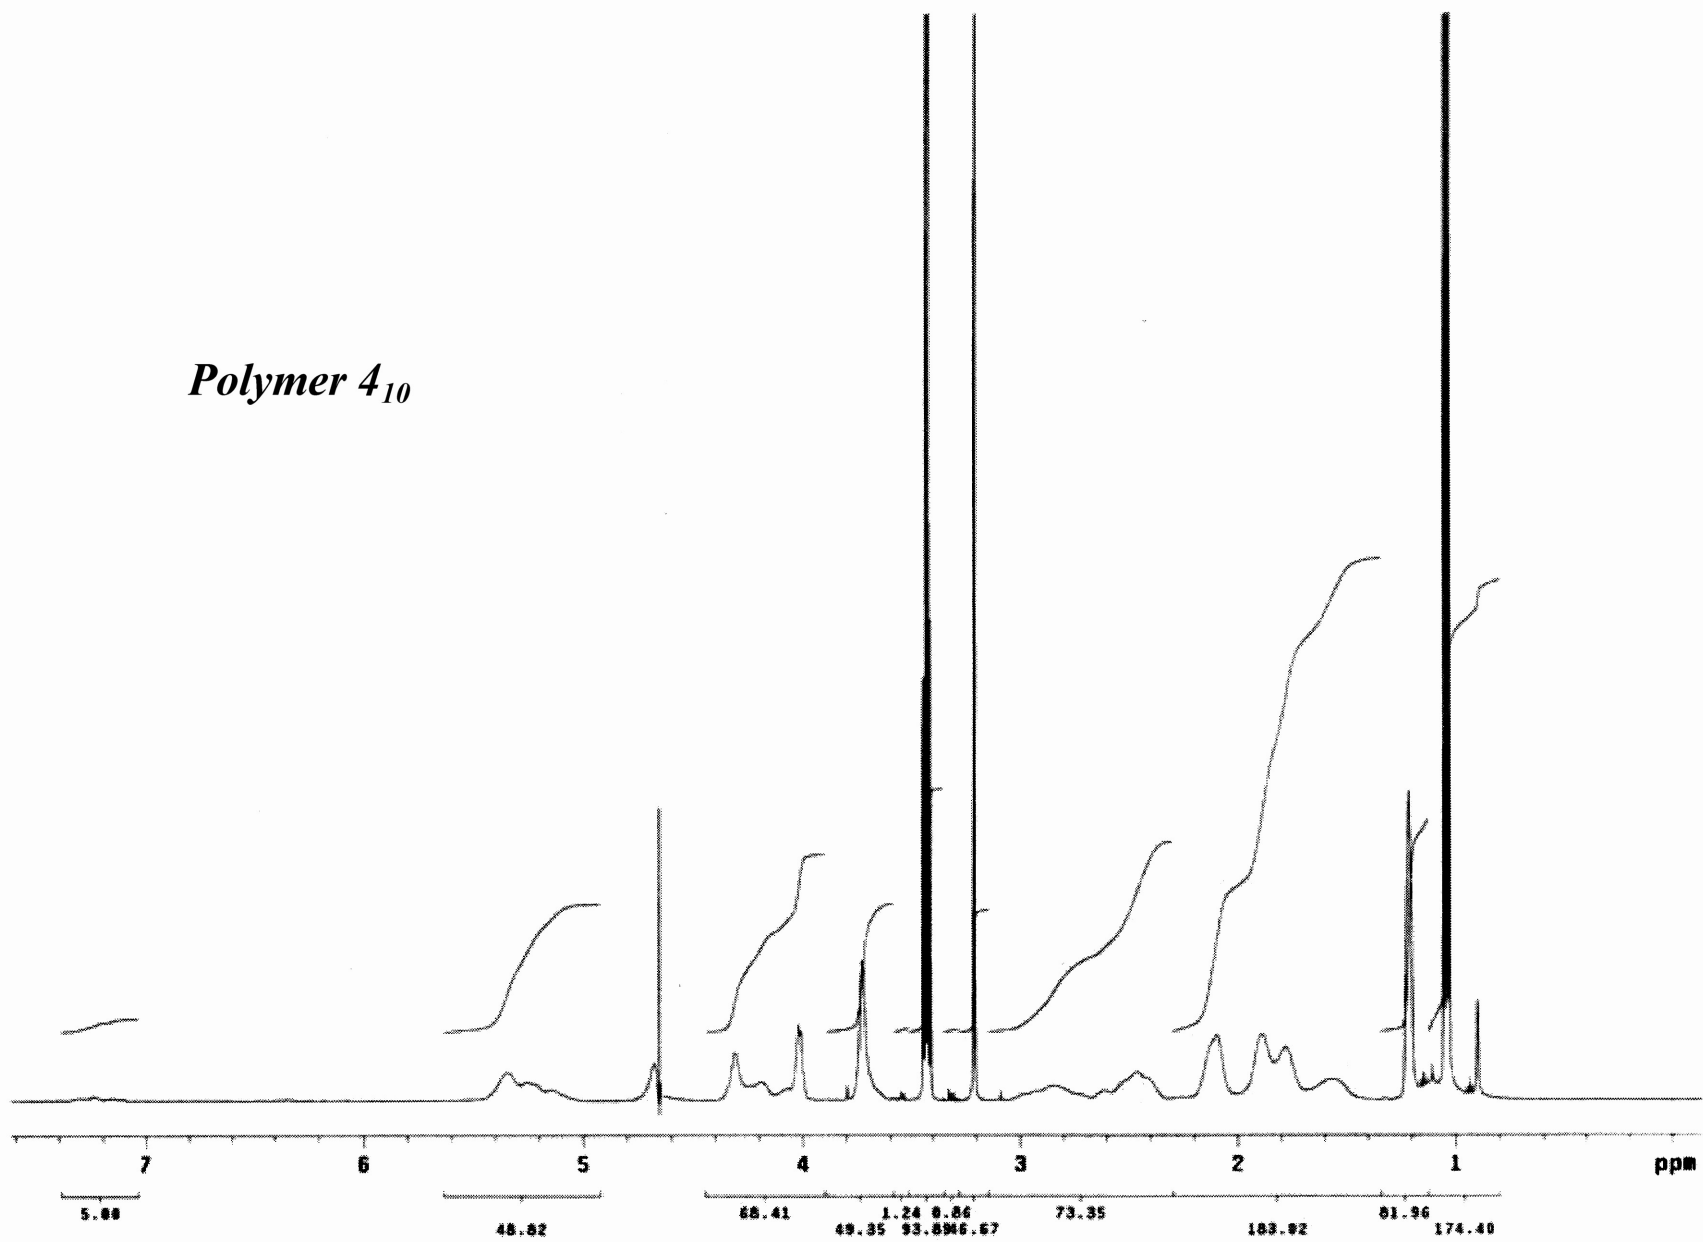

*Polymer 4<sub>60</sub>*

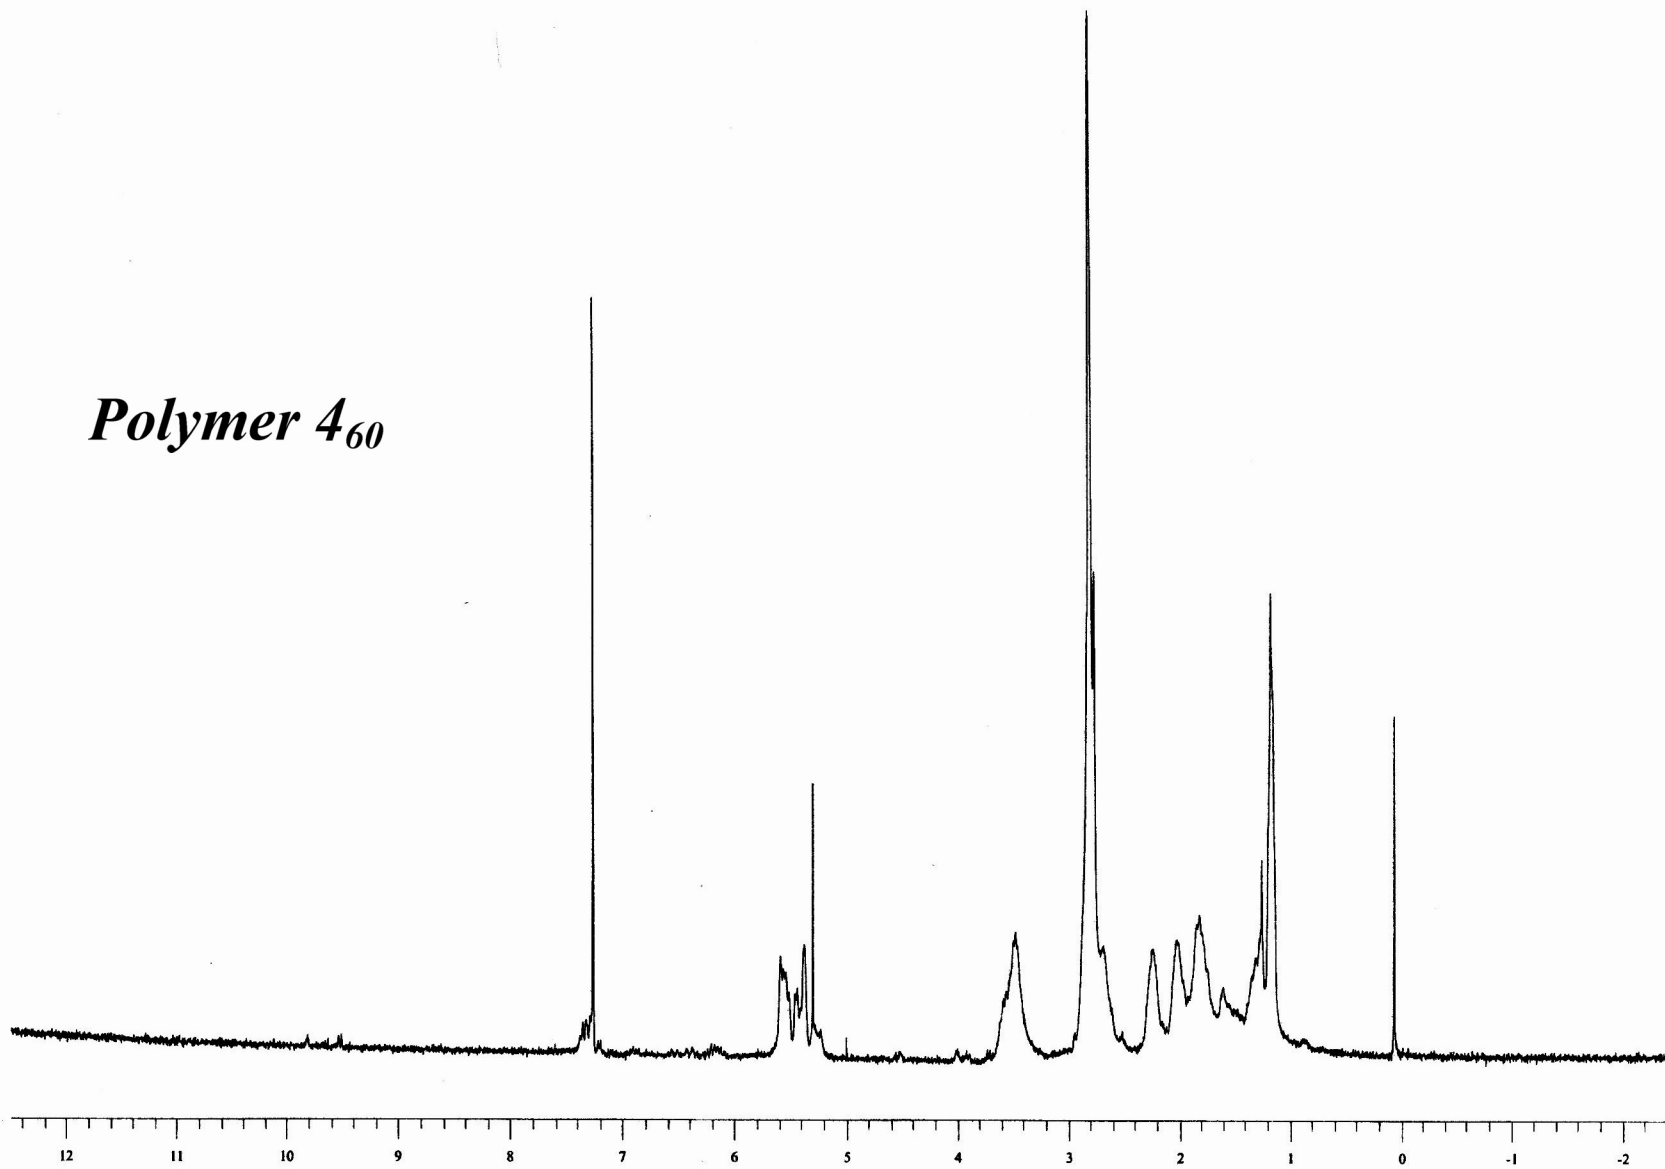

STANDARD PROTON PARAMETERS

Pulse Sequence: s2pu1

Solvent: D2O

Temp. 25.0 C / 298.1 K

File: ESA9-ECD1-82mer-Nov0504

INOVA-600 "inv601"

Relax. delay 1.000 sec

Pulse 81.7 degrees

Acq. time 1.892 sec

Width 8000.0 Hz

19832 repetitions

OBSERVE H1, 599.7221518 MHz

DATA PROCESSING

FT size 32768

Total time 16 hr, 6 min, 56 sec

# Polymer 3<sub>8</sub>/4<sub>72</sub>

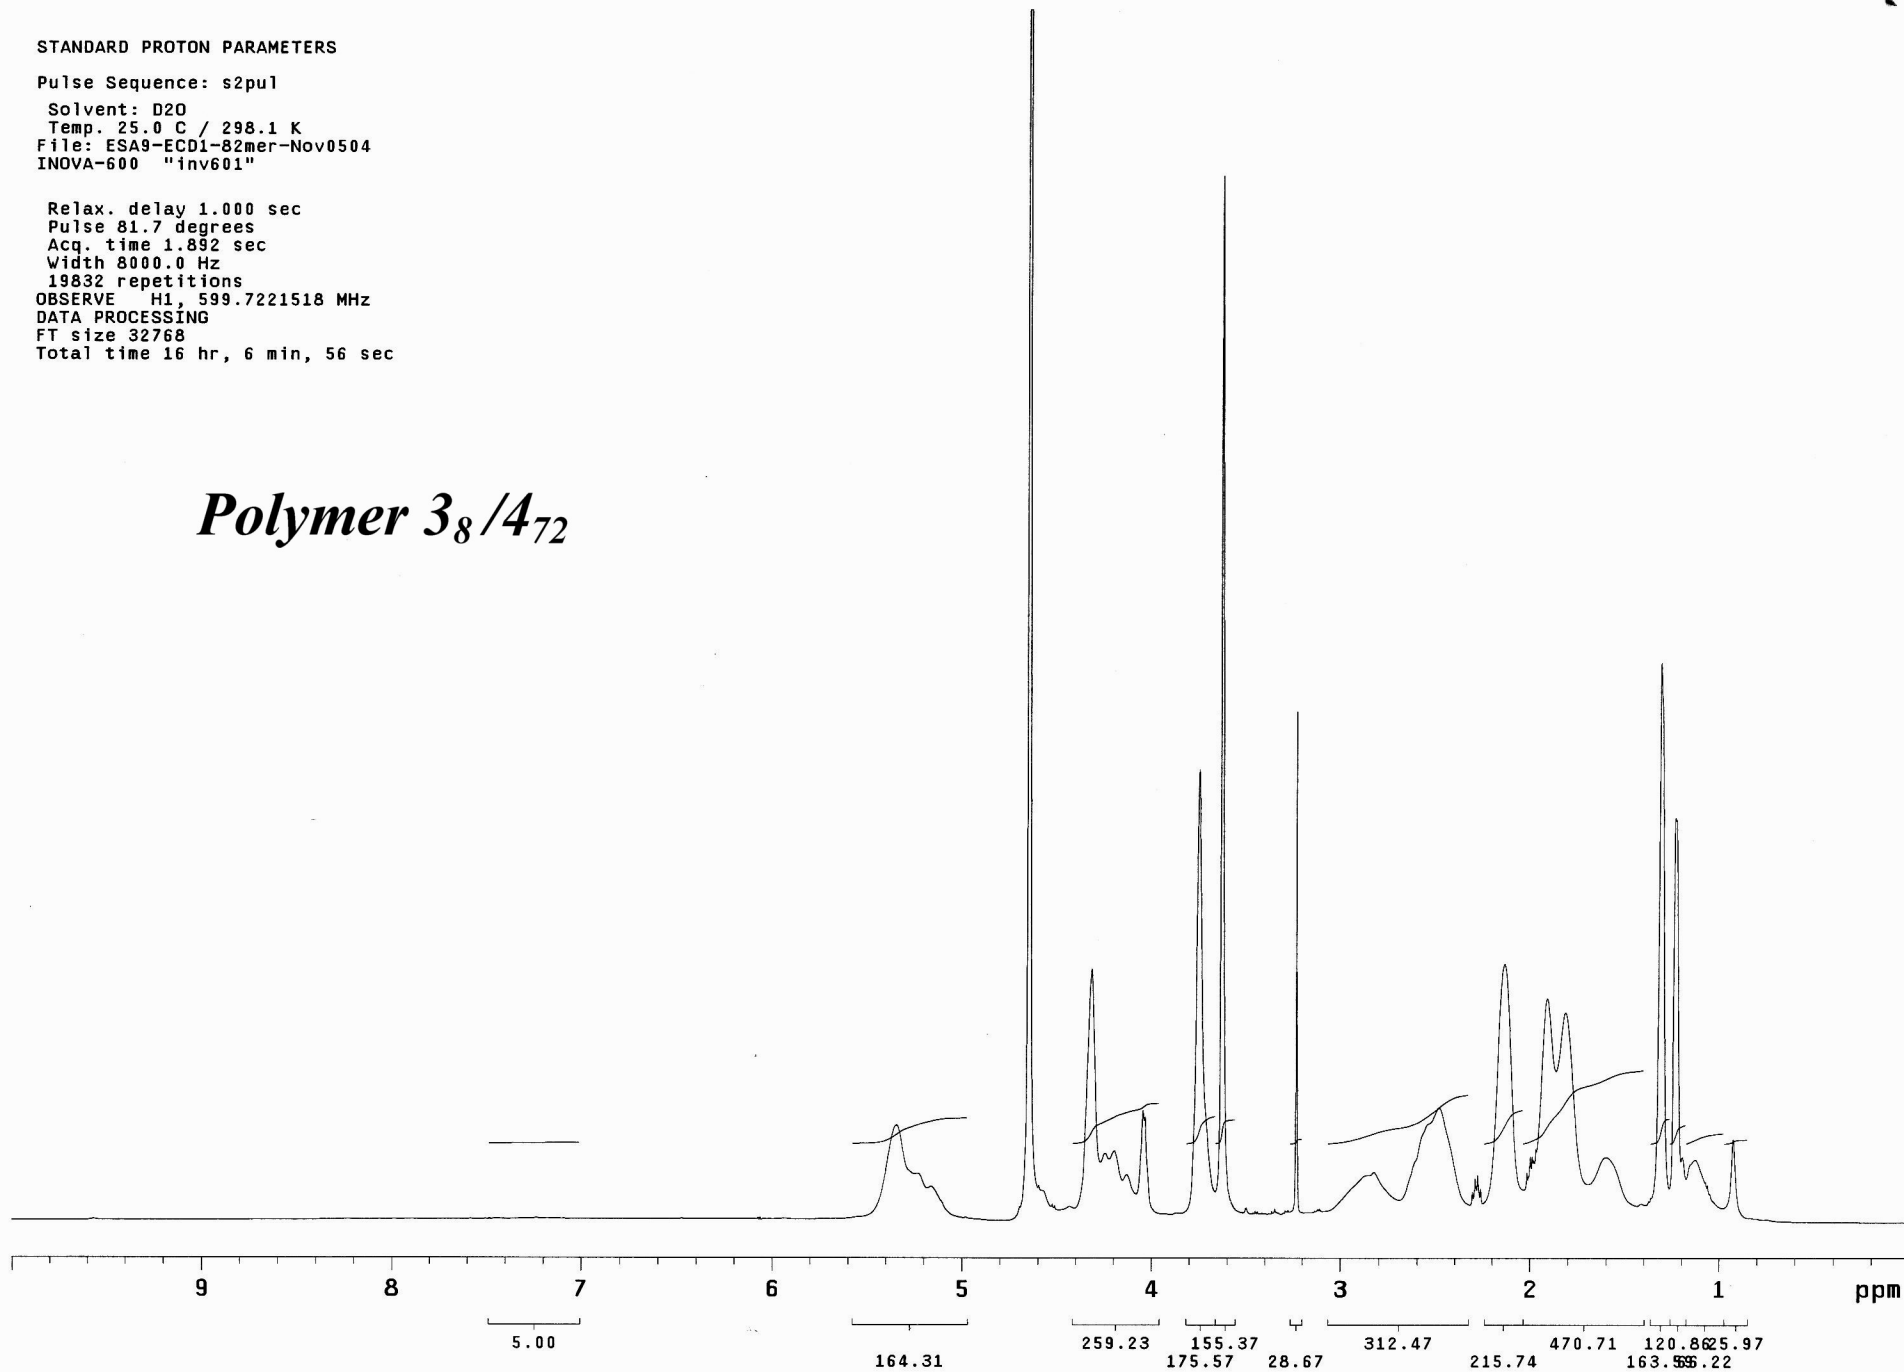

ECD2-ESA7-ECD2-II-3rd Cat

Pulse Sequence: presat

Solvent: D2O

Temp. 25.0 C / 298.1 K

File: ECD2-ESA7-ECD2-II-Final

INOVA-500 "inv500"

Pulse 80.8 degrees

Acq. time 1.892 sec

Width 8000.0 Hz

500 repetitions

OBSERVE H1, 499.8957669 MHz

DATA PROCESSING

FT size 32768

Total time 28 min, 20 sec

# Polymer 3<sub>2</sub>-4<sub>7</sub>-3<sub>2</sub>

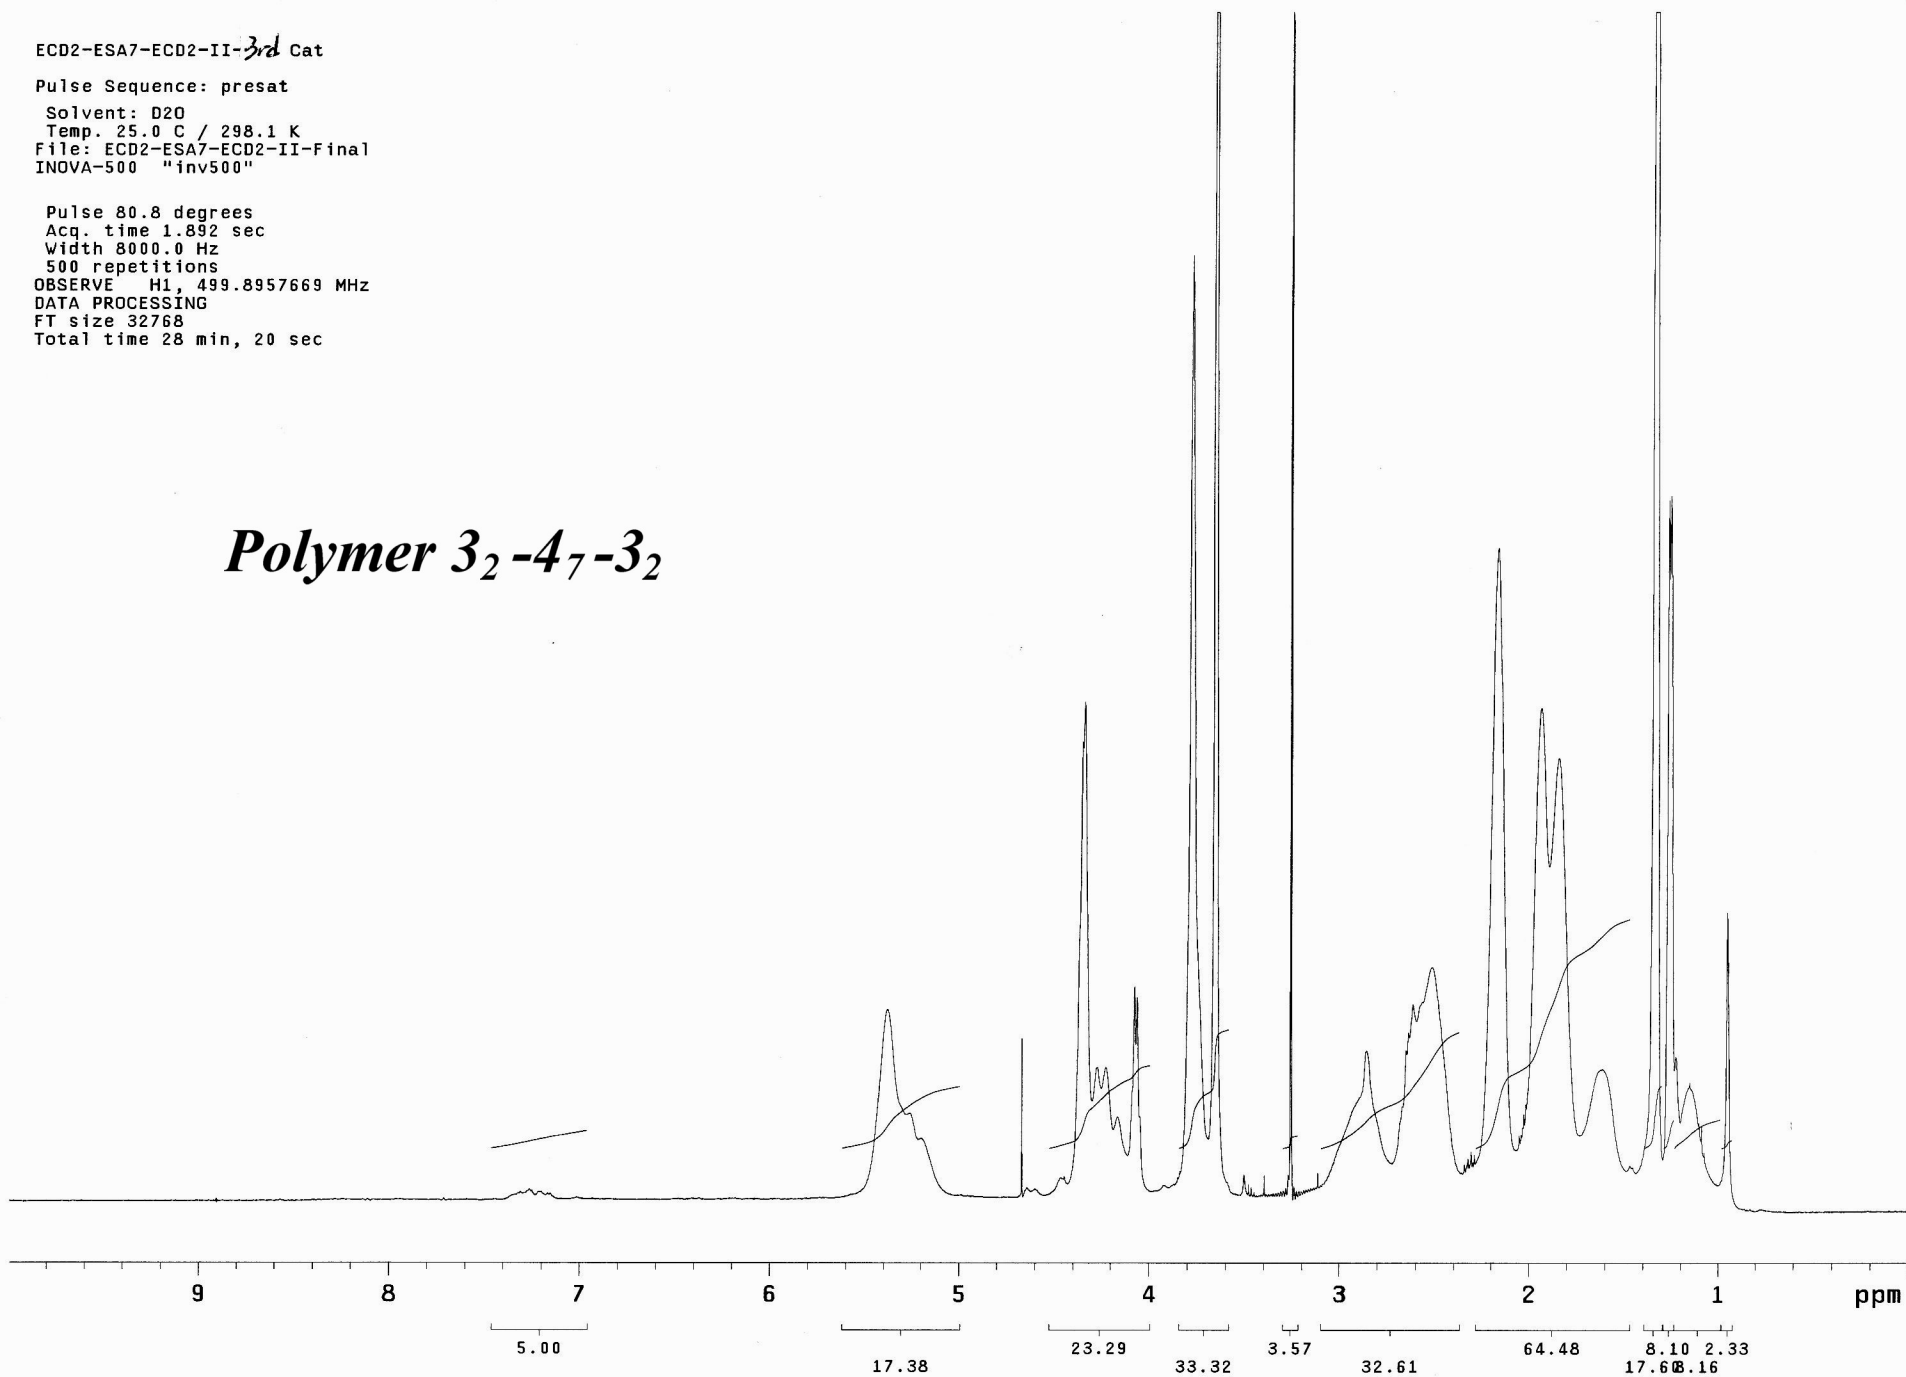

Supplement: NIHMS7430-supplement-supp.pdf [file NIHMS7430-supplement-supp.pdf]
